# Supplementary material for: A concise approach to indoles via oxidative C–H amination of 2-alkenylanilines using dioxygen as the sole oxidant
Source: Royal Society of Chemistry journal article supplement (doi:10.1039/c6ra03378d), 2016-01-01

## Supporting Information

### **A concise approach to the indoles via oxidative C–H amination of 2-alkenylanilines using dioxygen as the sole oxidant**

Ai-Lun Ma, Yin-Long Li, Jian Li and Jun Deng\*

School of Pharmaceutical Science and Technology, Key Laboratory for Modern Drug  
Delivery & High-Efficiency, Tianjin University, Tianjin, 300072 P. R. China.

E-mail: jdeng@tju.edu.cn

#### **Table of Contents**

|                            |    |
|----------------------------|----|
| Copies of NMR spectra..... | S2 |
|----------------------------|----|

### <sup>1</sup>H NMR of compound 2a

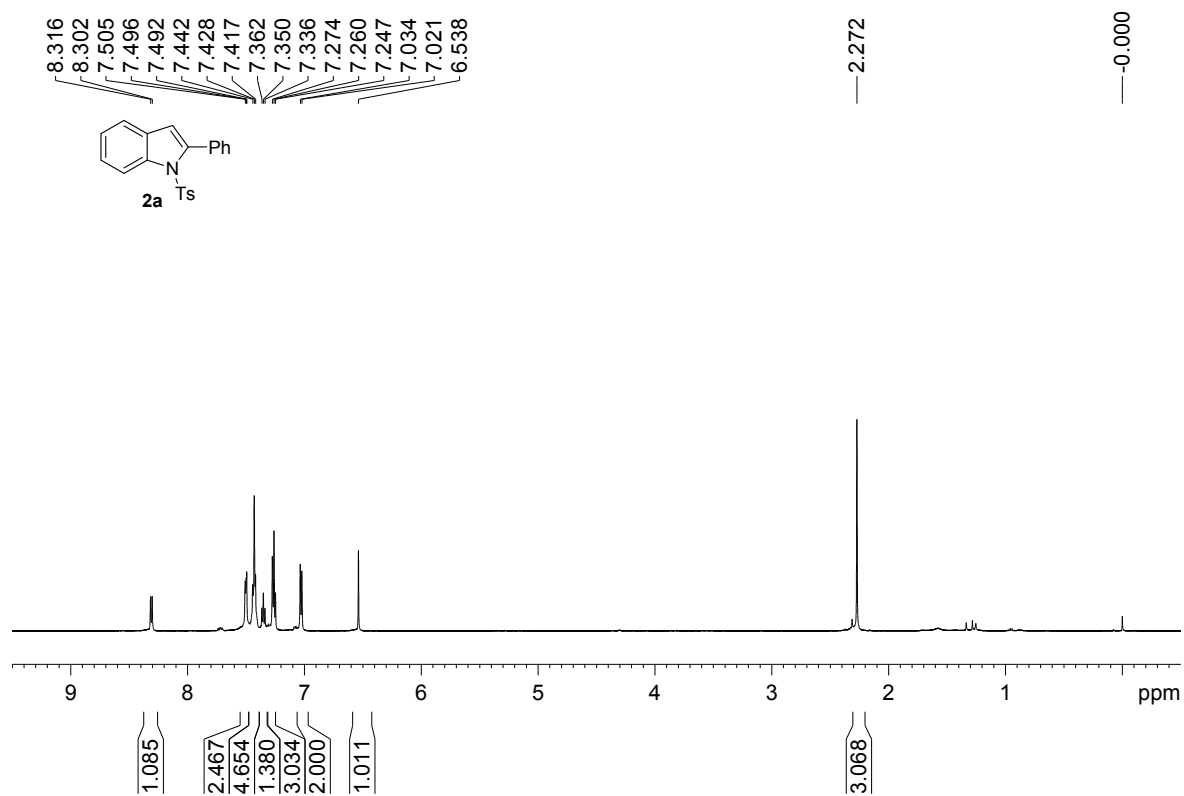

### <sup>13</sup>C NMR of compound 2a

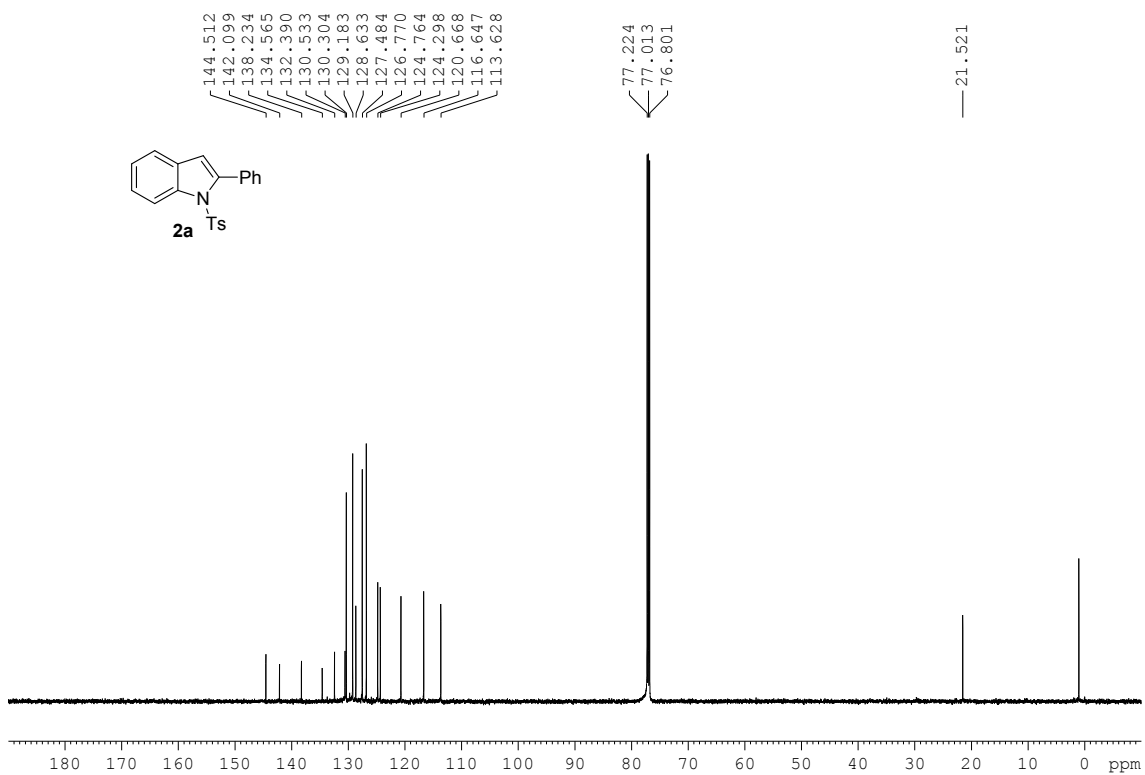

### <sup>1</sup>H NMR of compound 2b

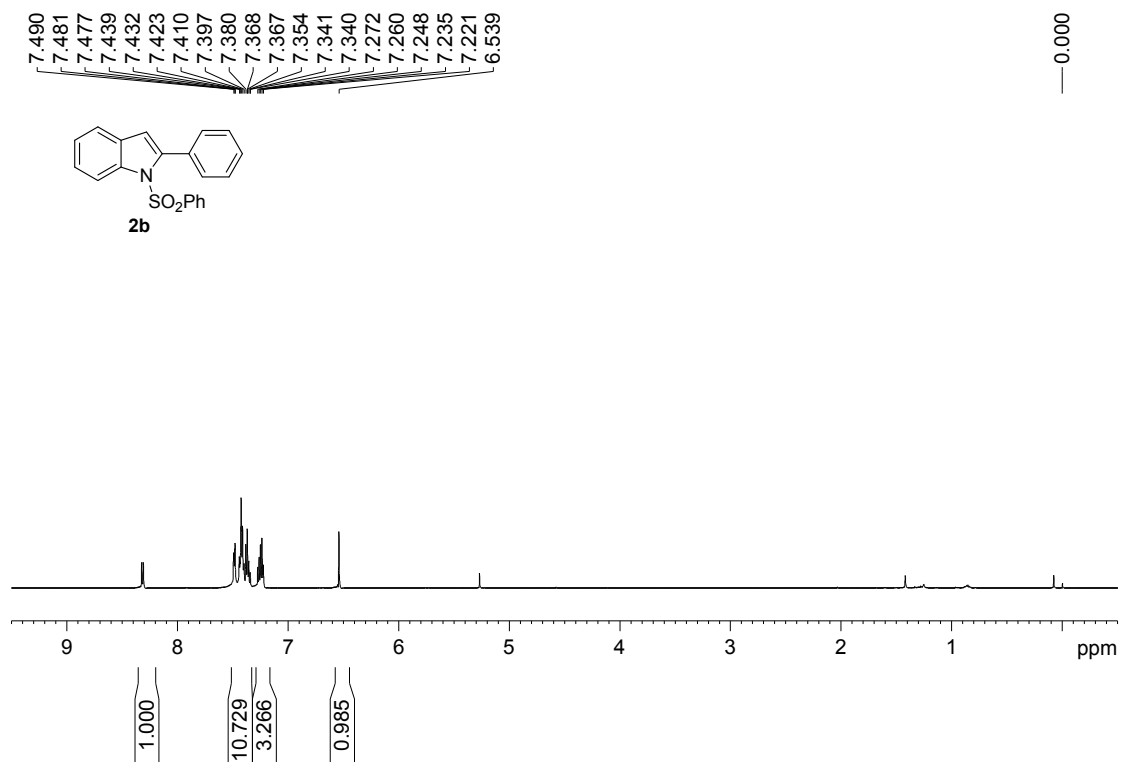

### <sup>13</sup>C NMR of compound 2b

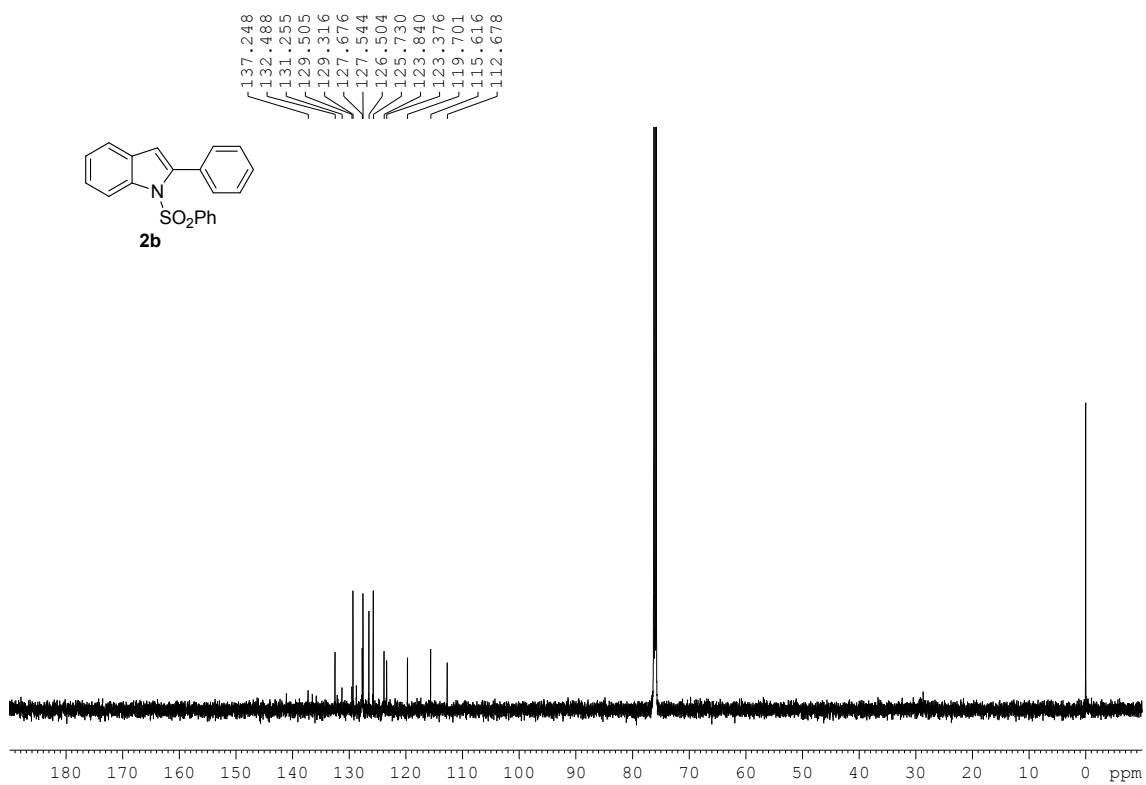

### <sup>1</sup>H NMR of compound 2c

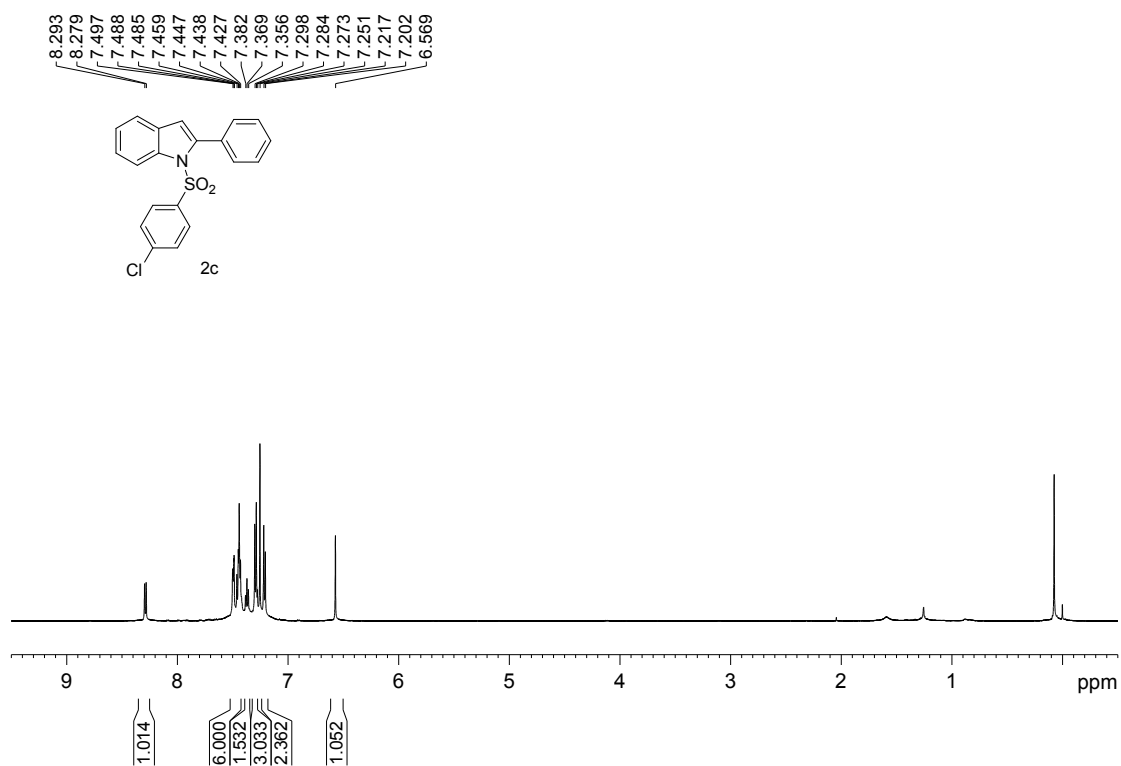

### <sup>13</sup>C NMR of compound 2c

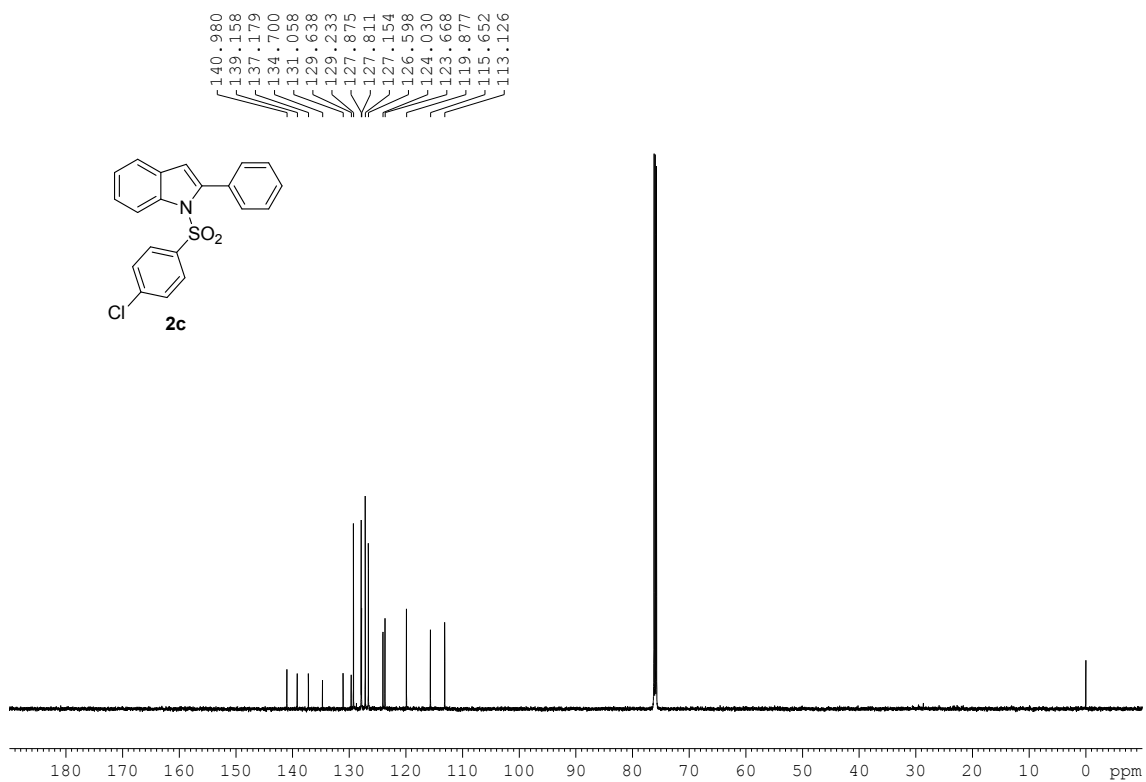

### <sup>1</sup>H NMR of compound 2d

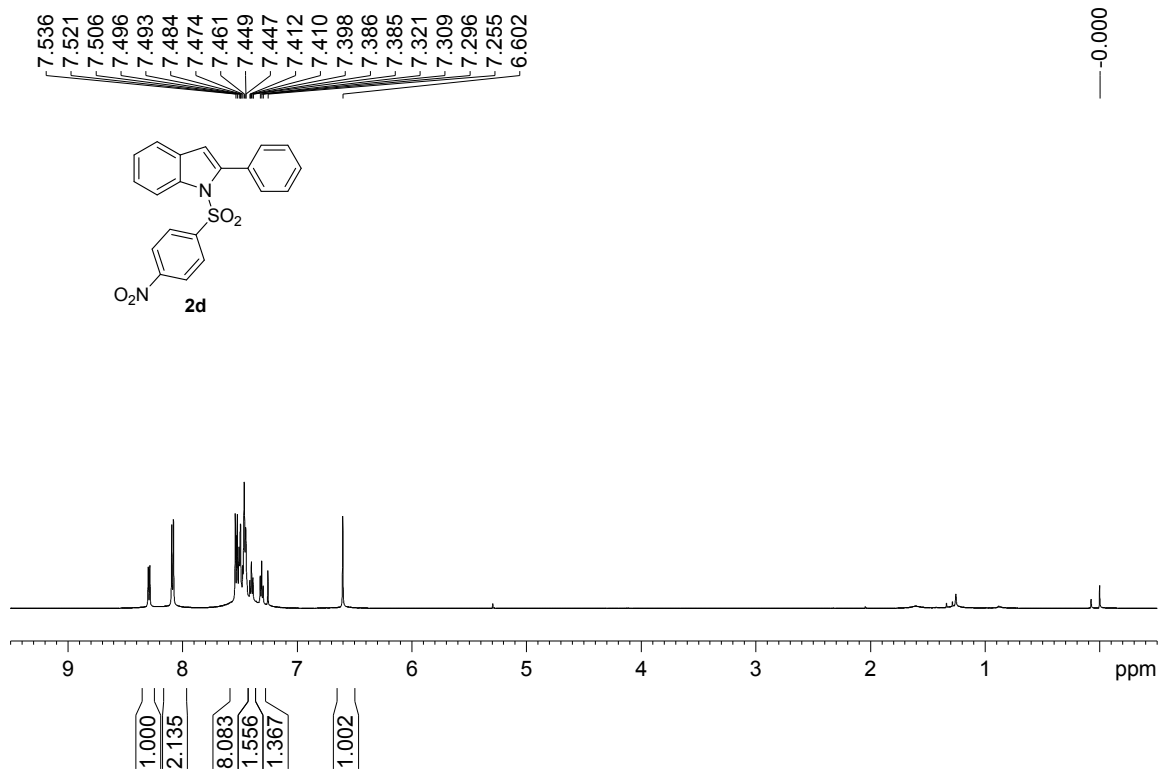

### <sup>13</sup>C NMR of compound 2d

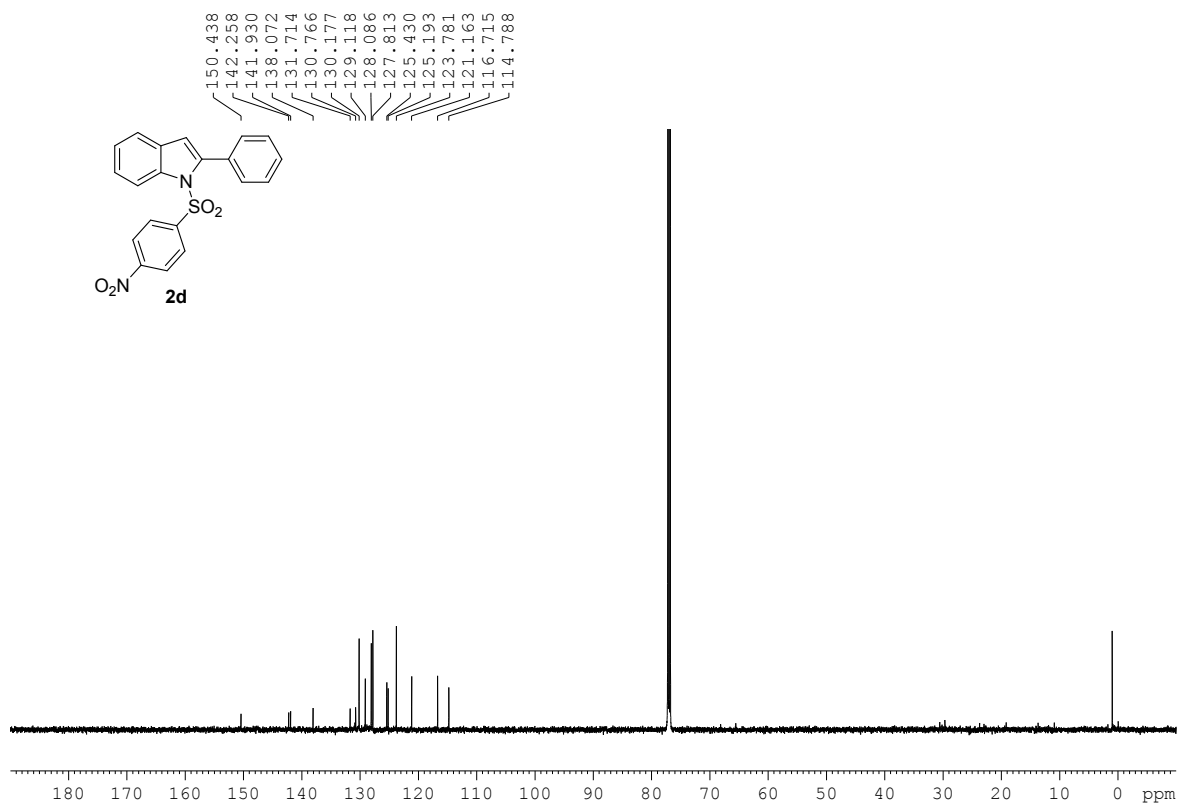

### <sup>1</sup>H NMR of compound 2f

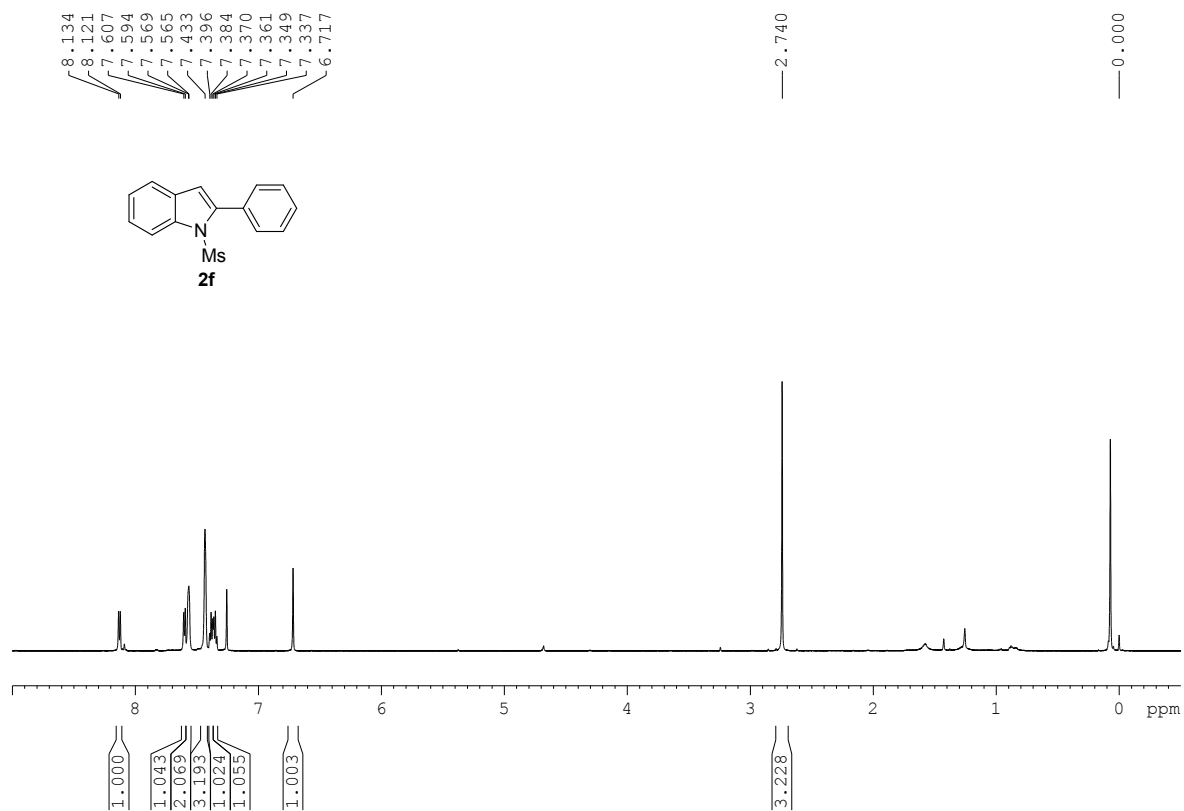

### <sup>13</sup>C NMR of compound 2f

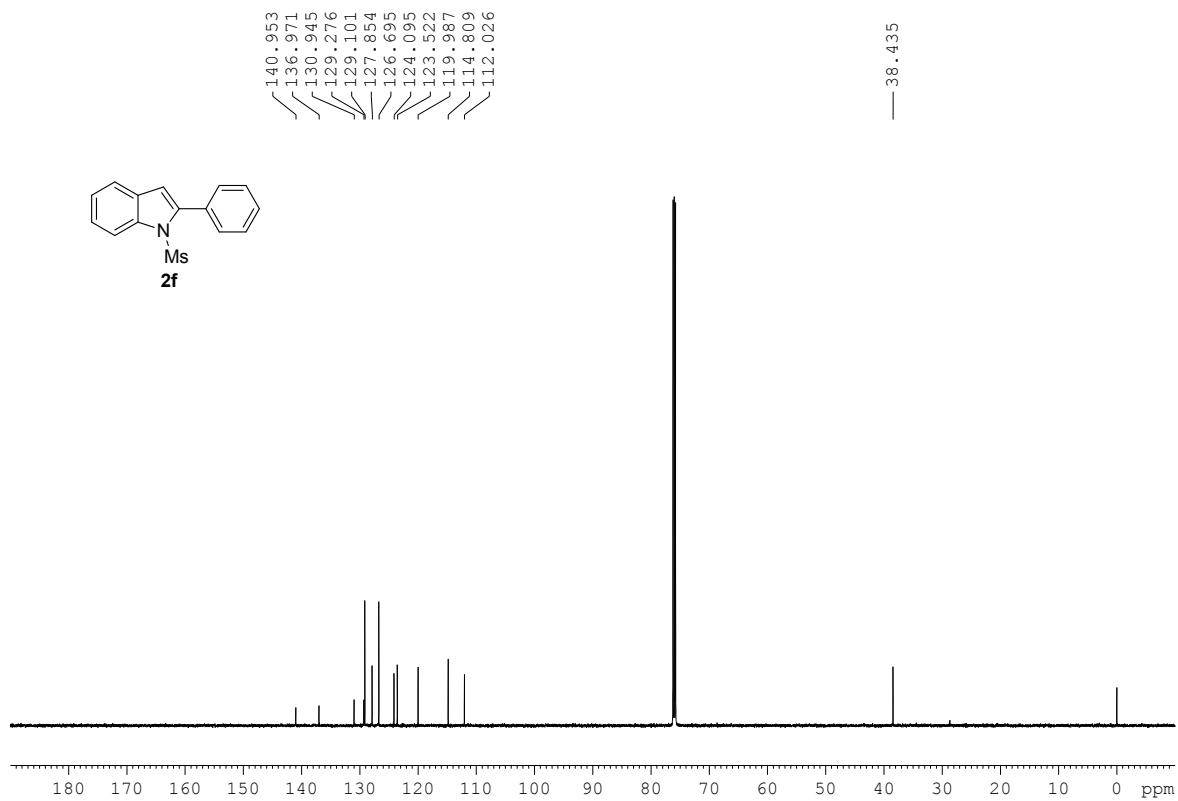

### <sup>1</sup>H NMR of compound 2j

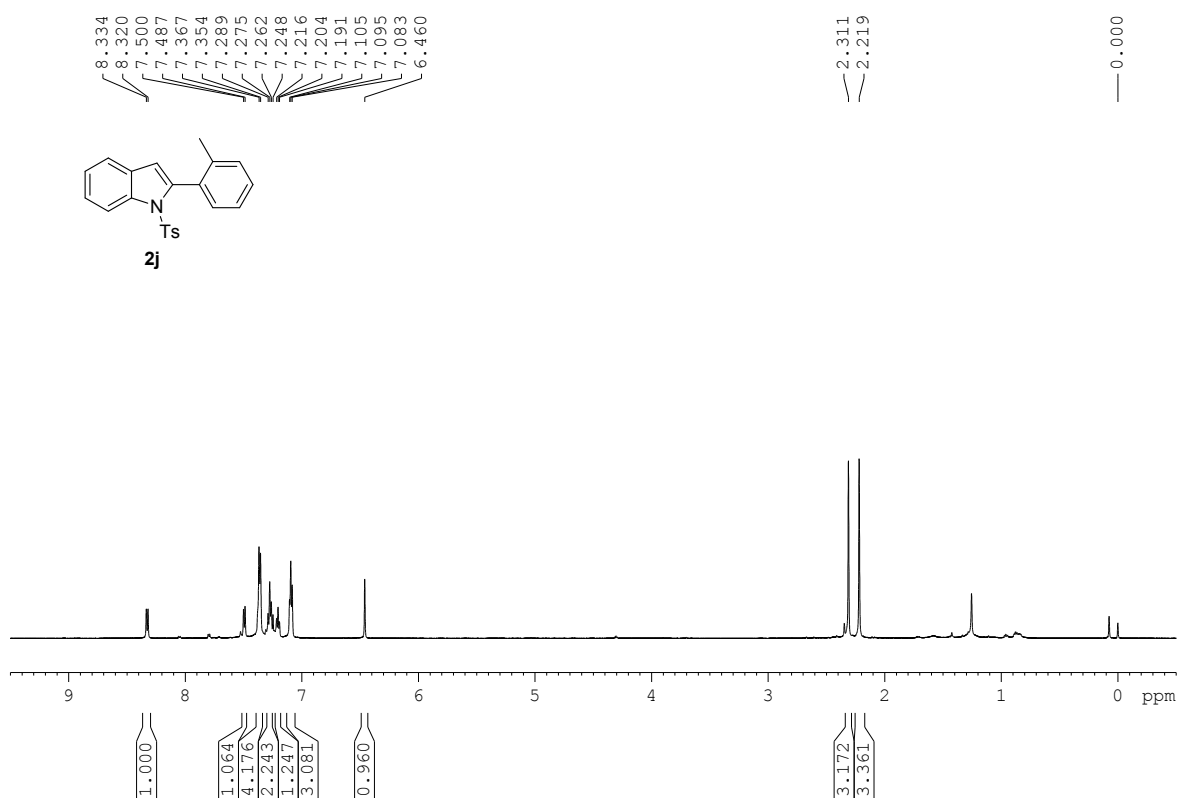

### <sup>13</sup>C NMR of compound 2j

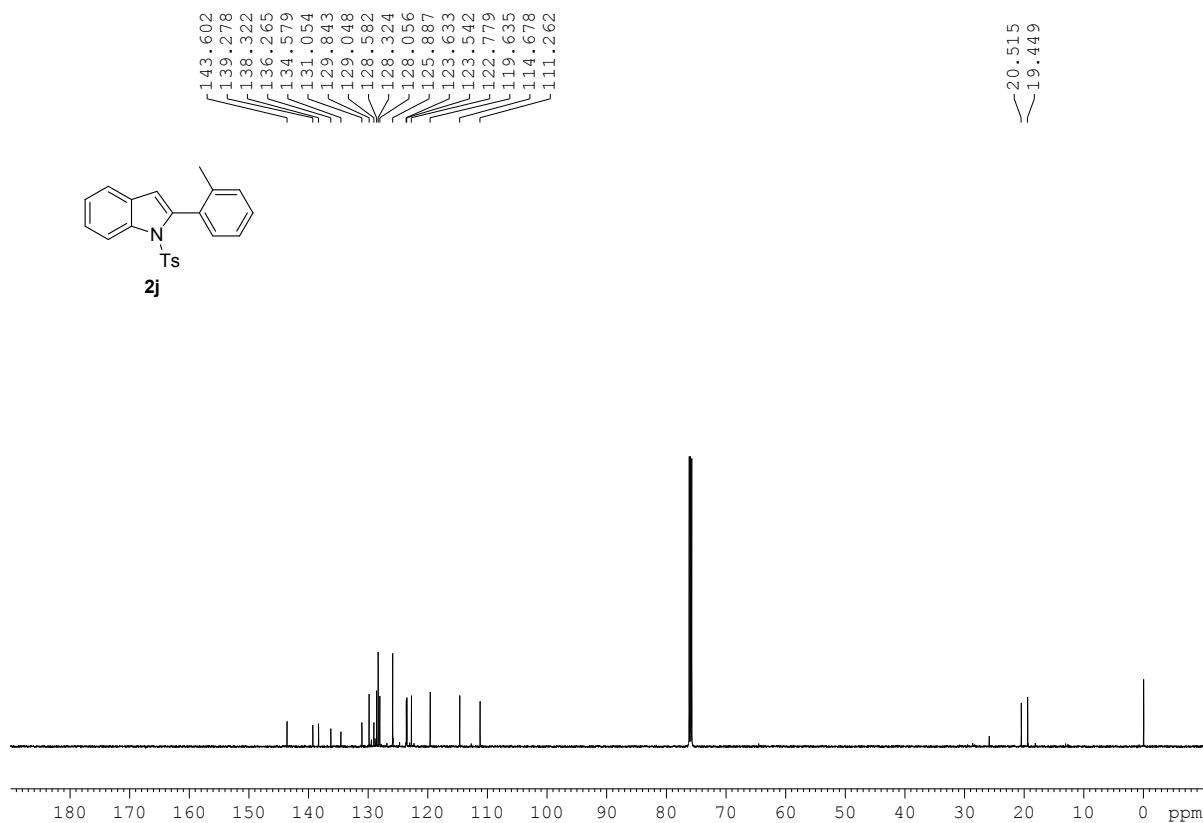

### <sup>1</sup>H NMR of compound 2k

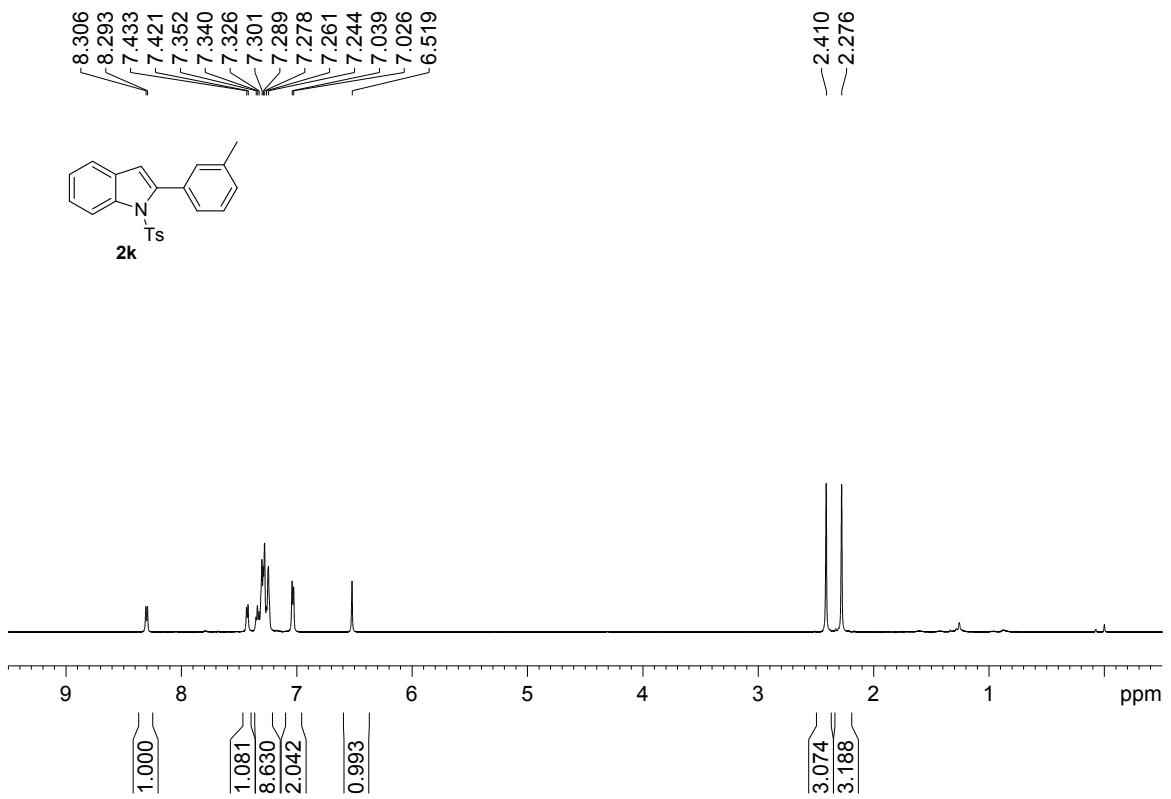

### <sup>13</sup>C NMR of compound 2k

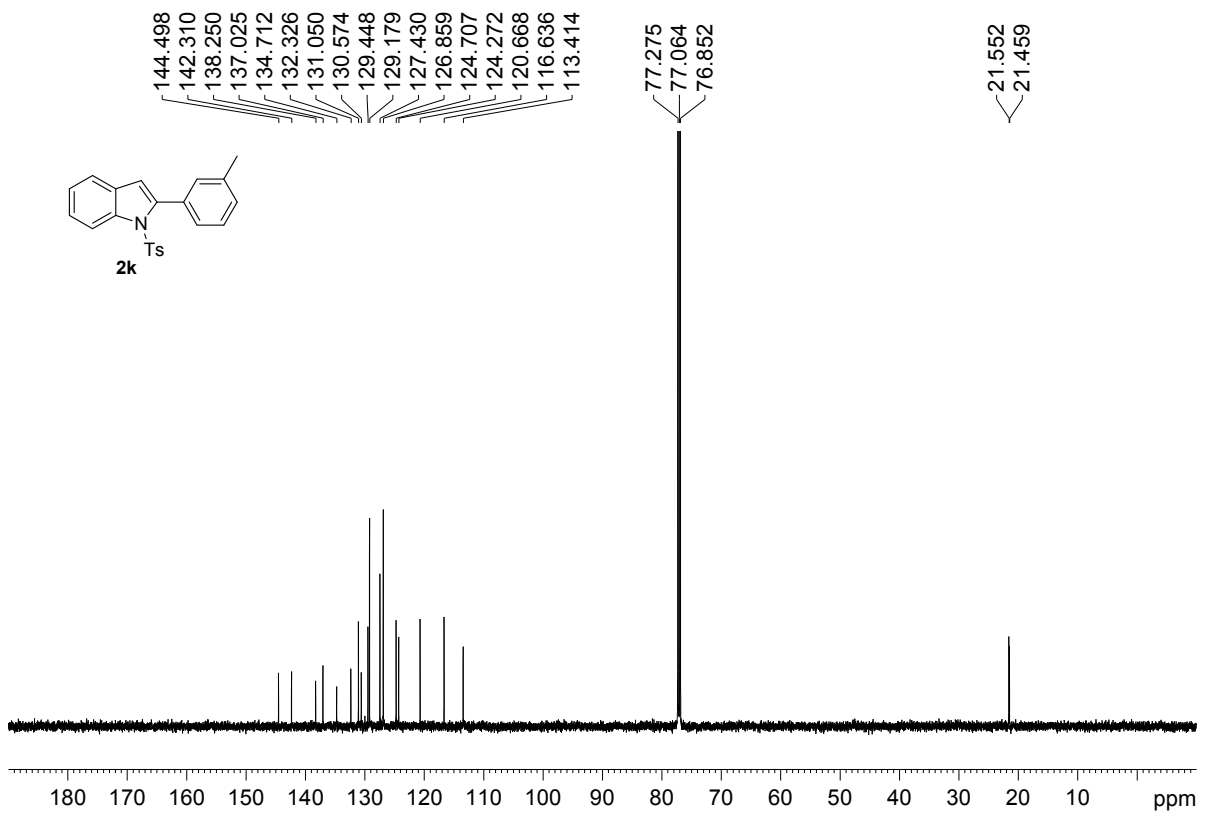



### <sup>1</sup>H NMR of compounds 21

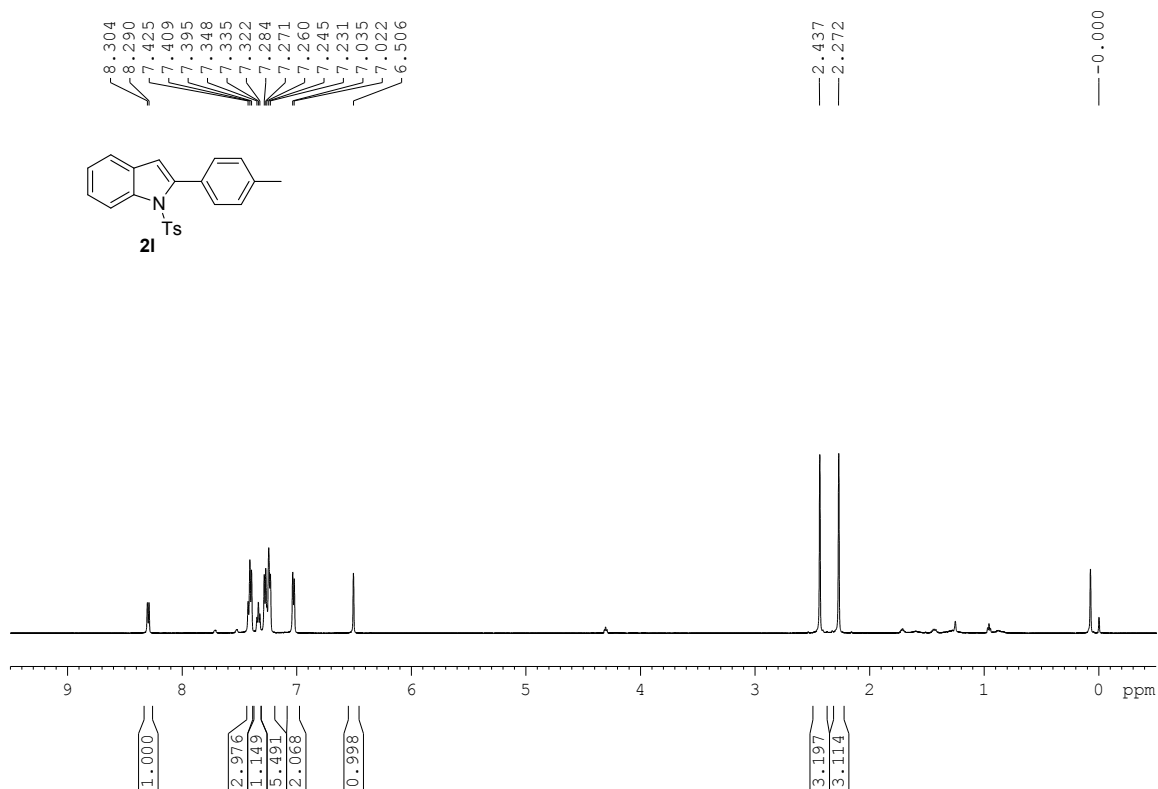

### <sup>13</sup>C NMR of compounds 21

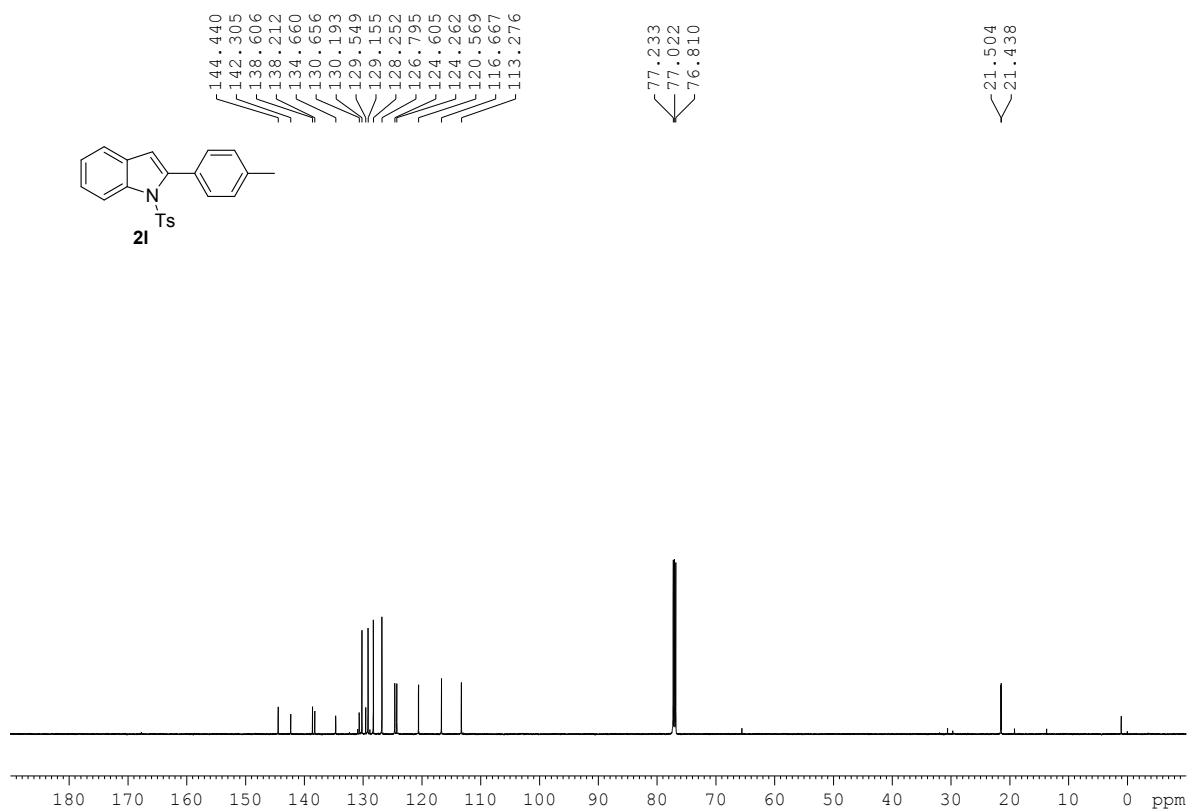

### <sup>1</sup>H NMR of compound 2m

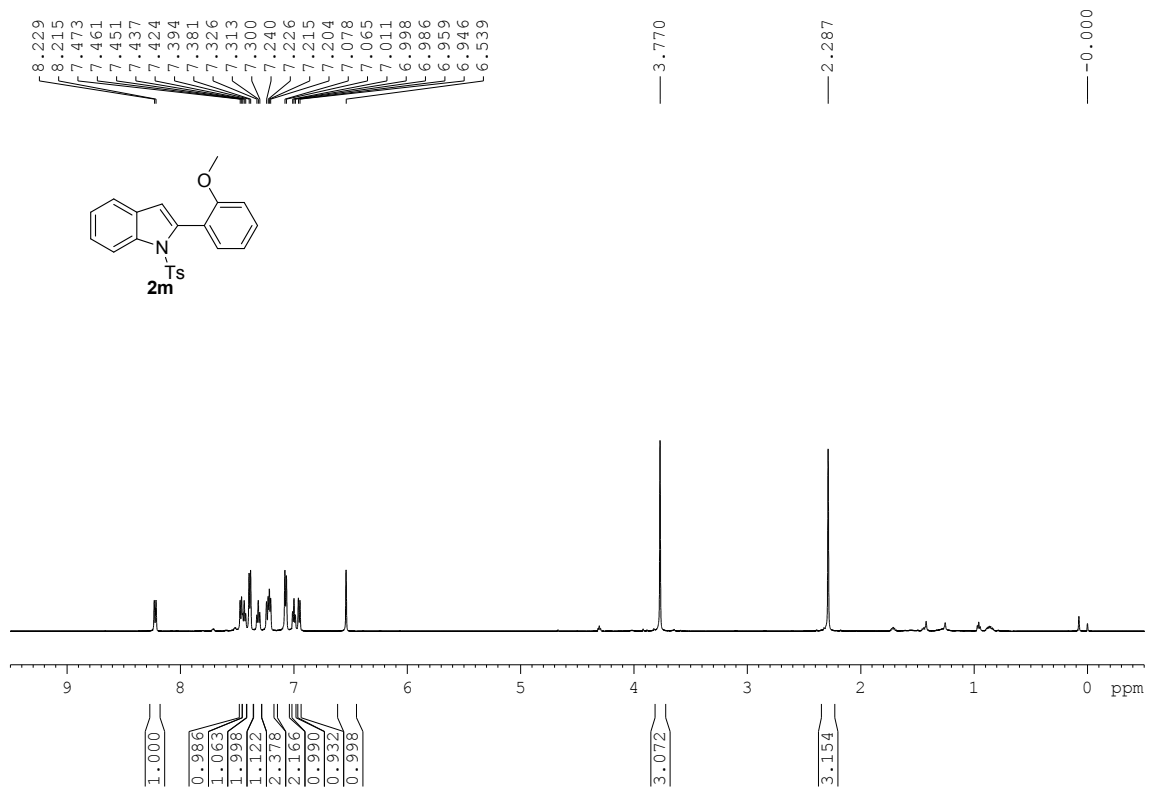

### <sup>13</sup>C NMR of compound 2m

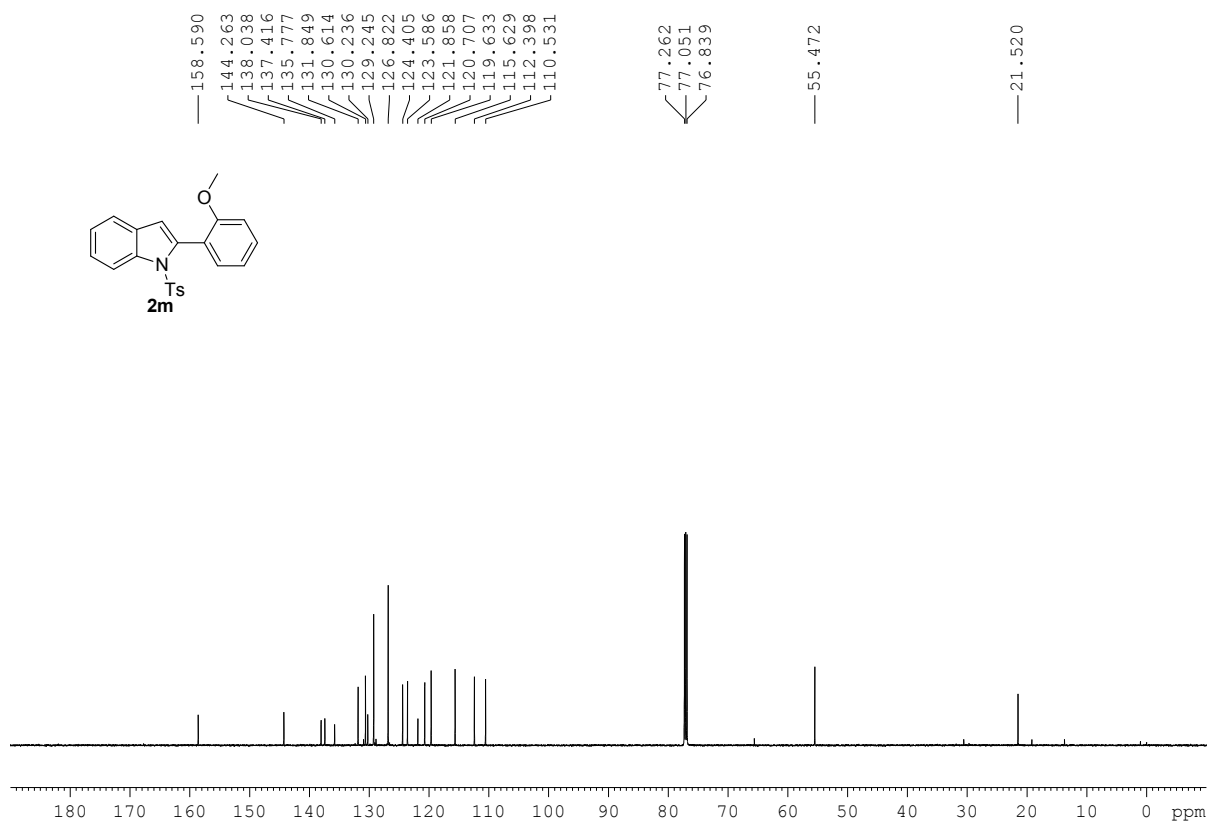

### <sup>1</sup>H NMR of compound 2n

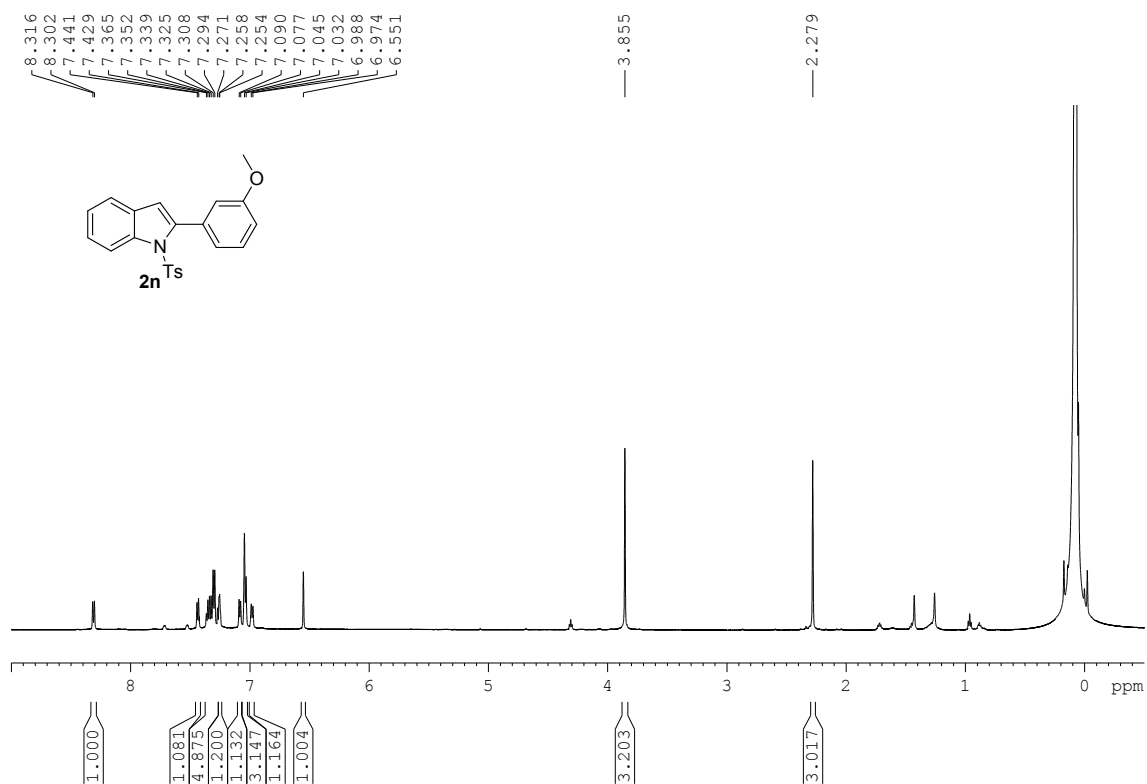

### <sup>13</sup>C NMR of compound 2n

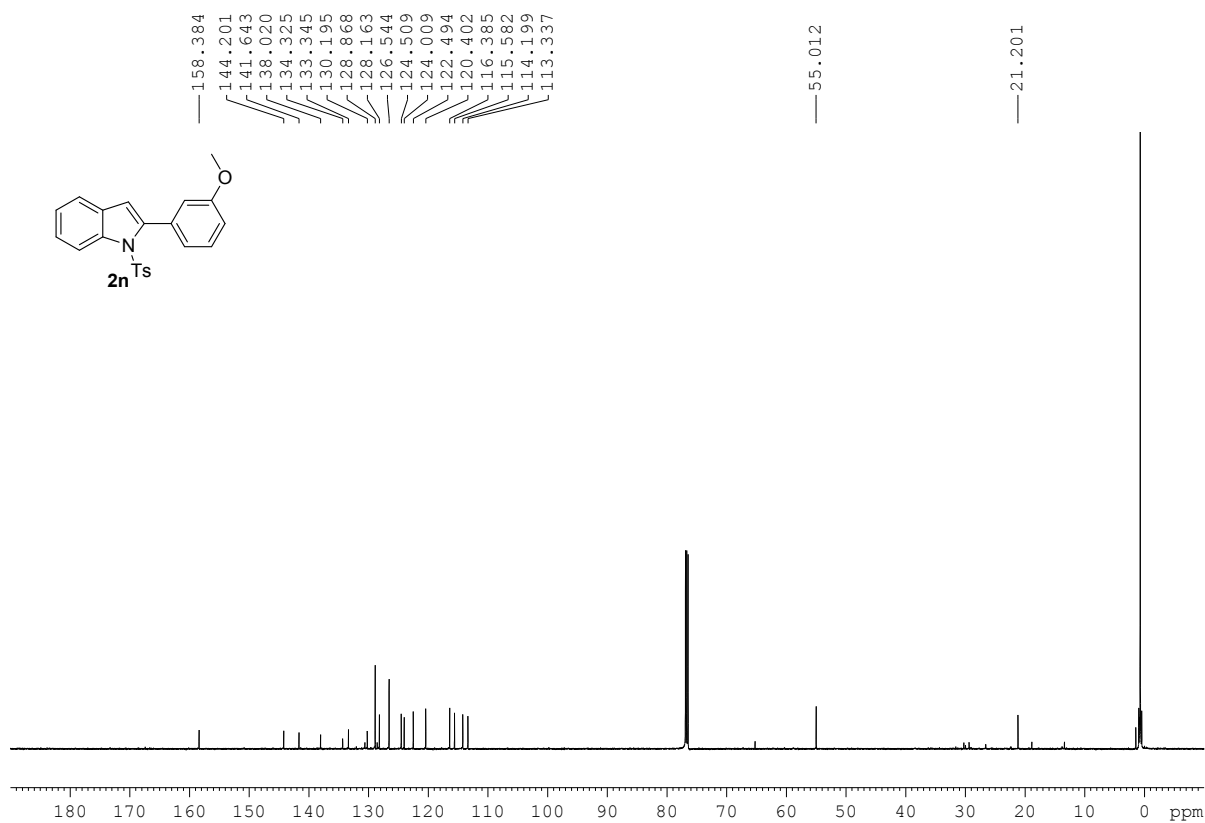

### $^1\text{H}$ NMR of compound 2o

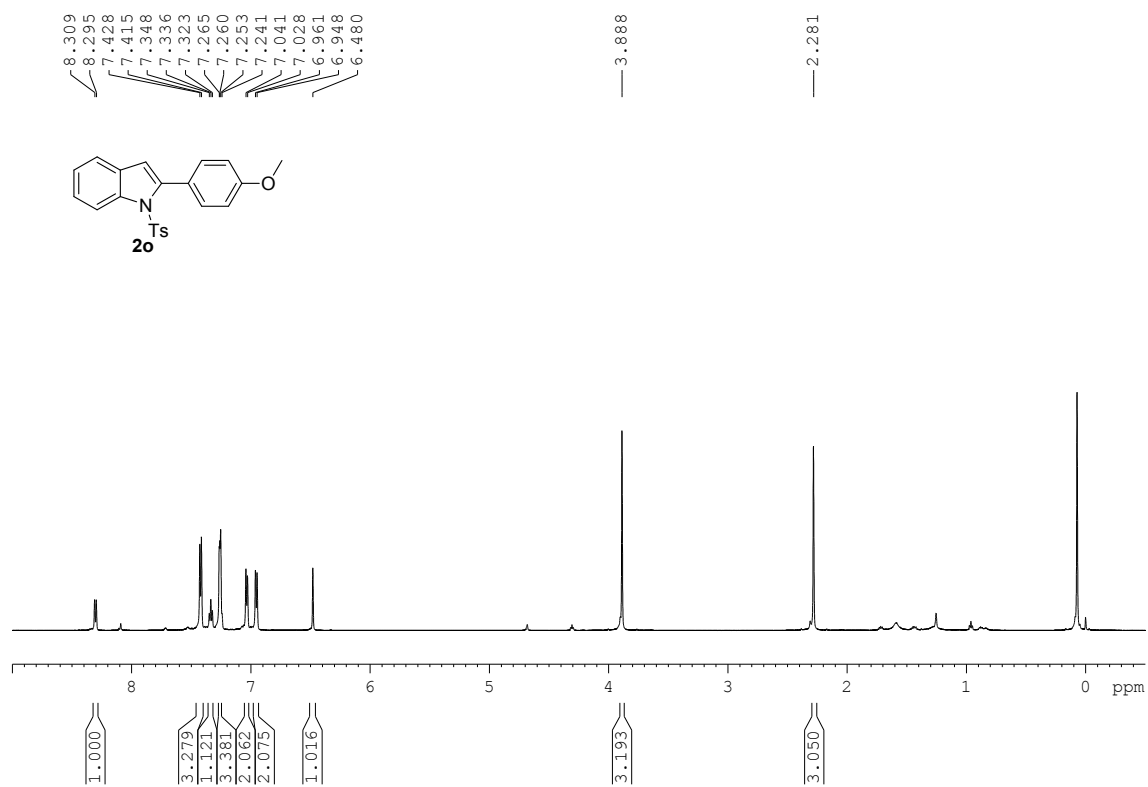

### $^{13}\text{C}$ NMR of compound 2o

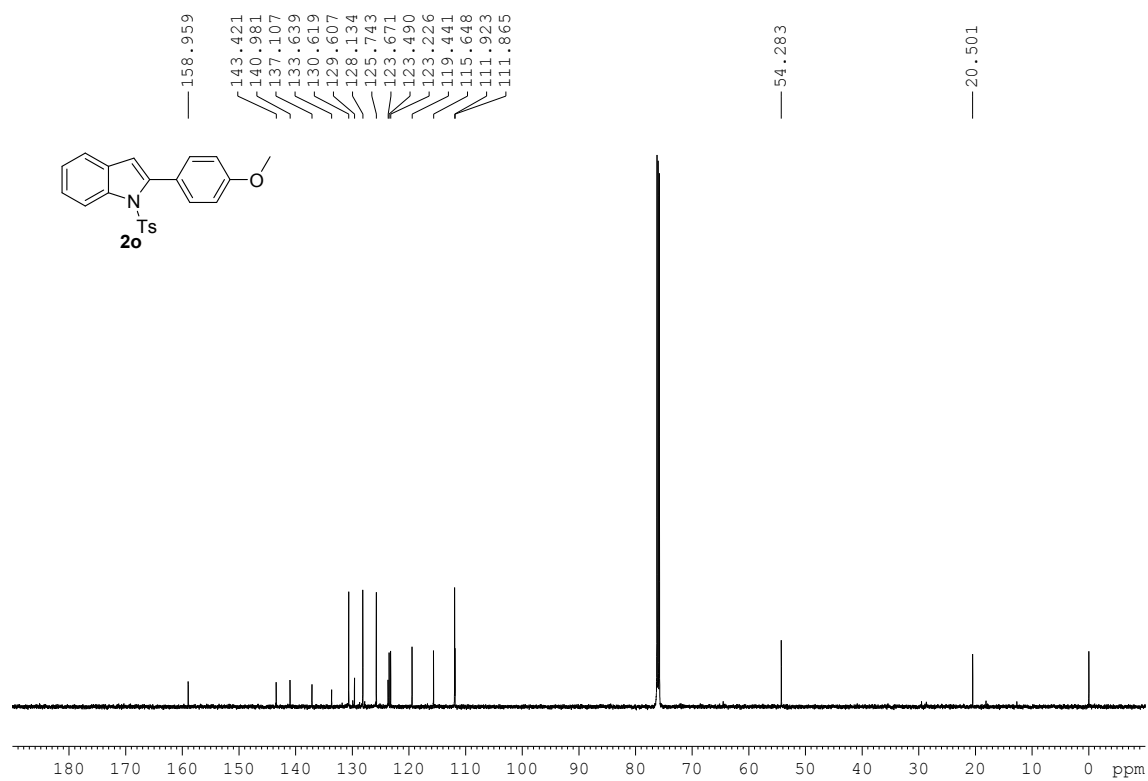

### <sup>1</sup>H NMR of compound 2p

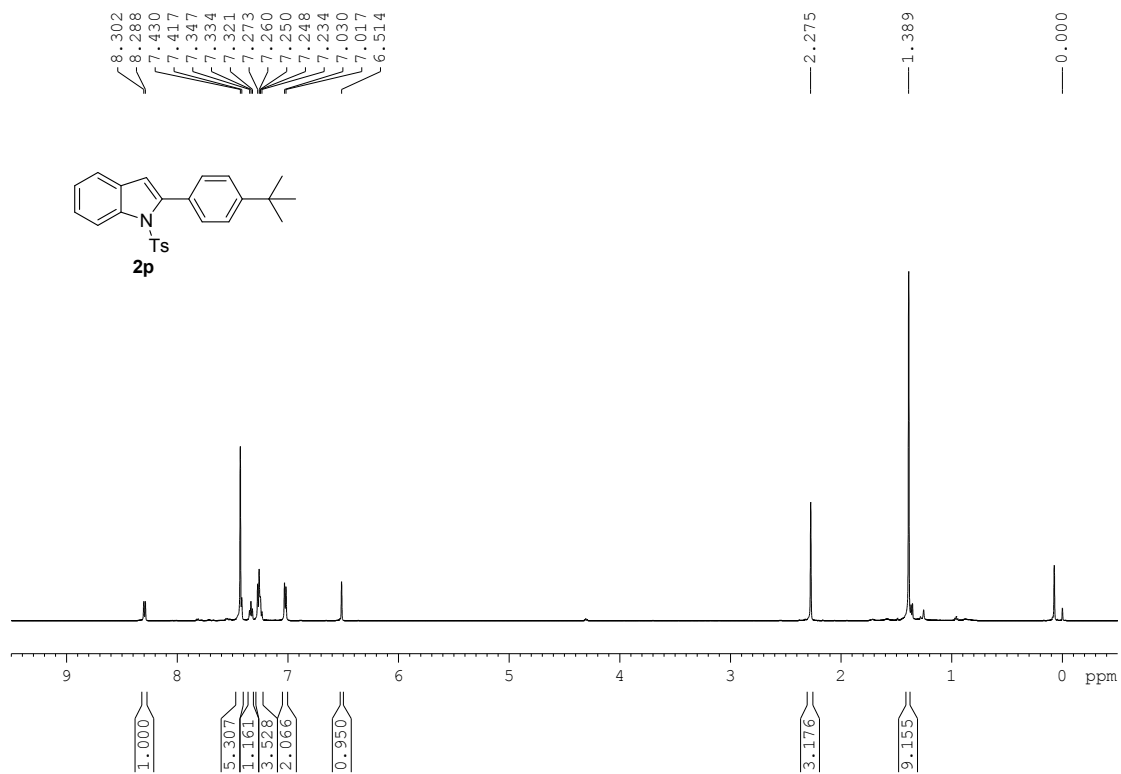

### <sup>13</sup>C NMR of compound 2p

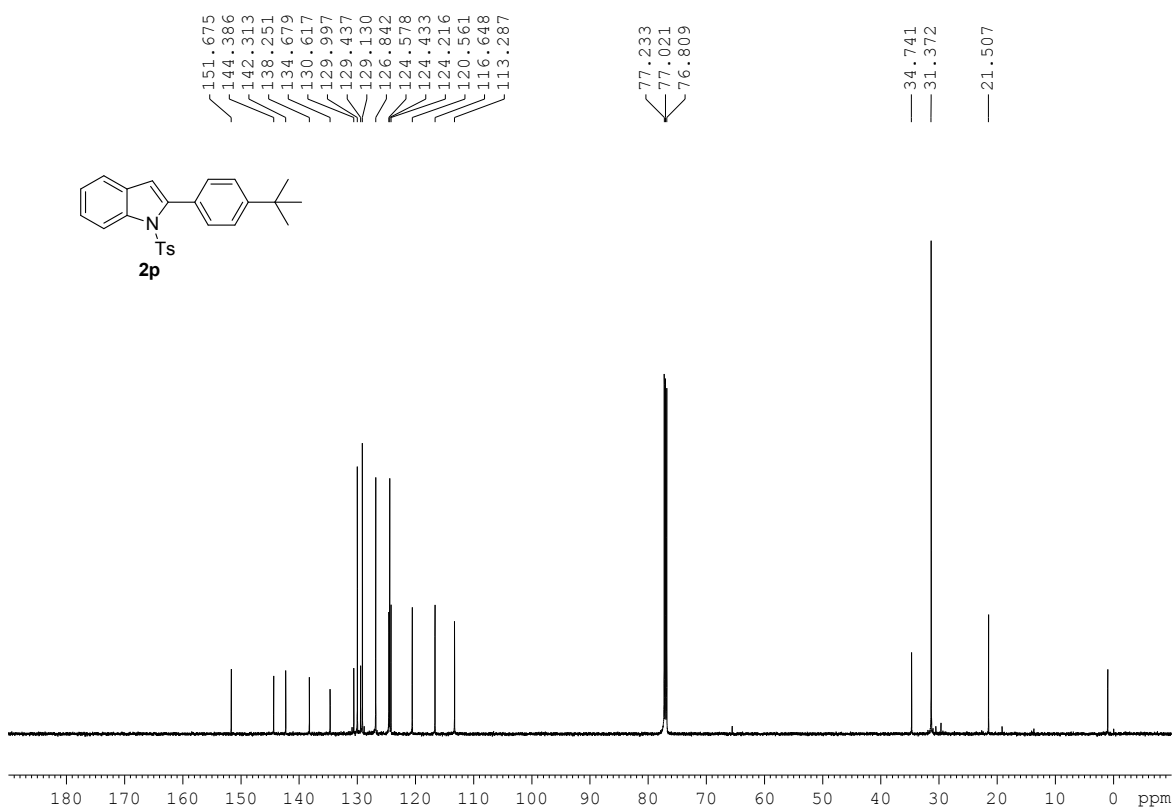

### <sup>1</sup>H NMR of compound 2q

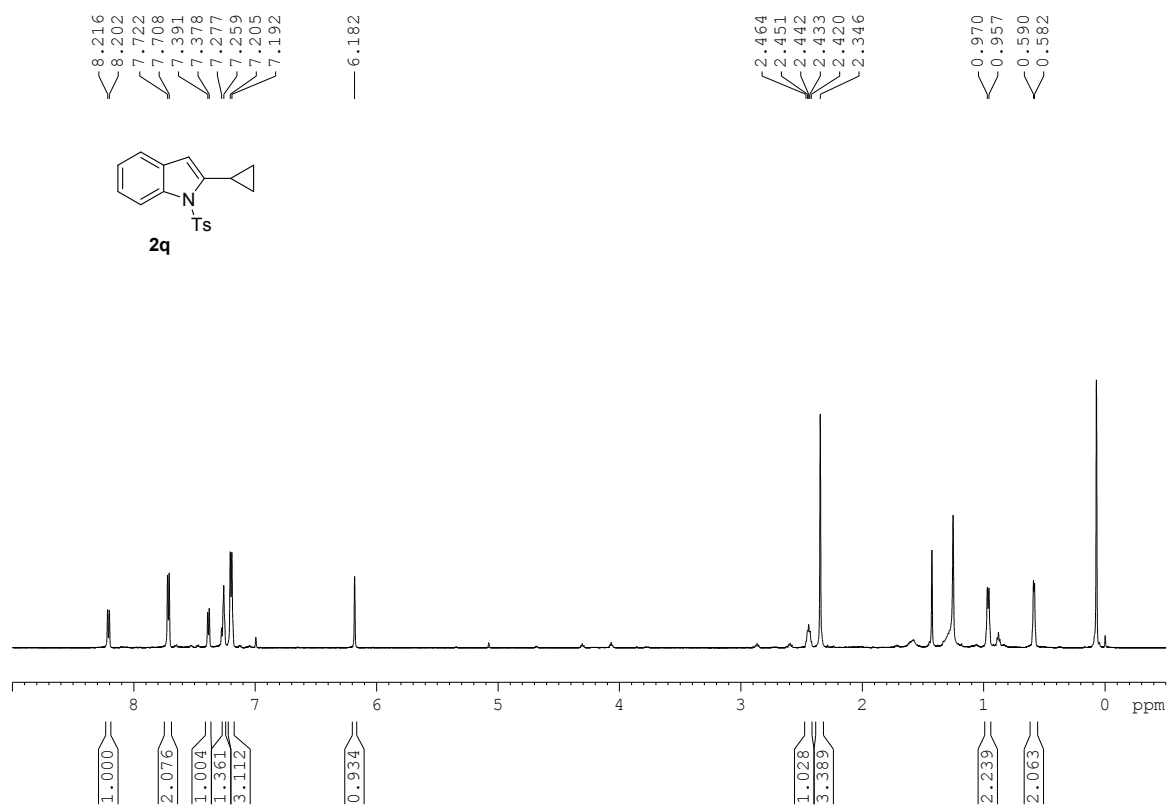

### <sup>13</sup>C NMR of compound 2q

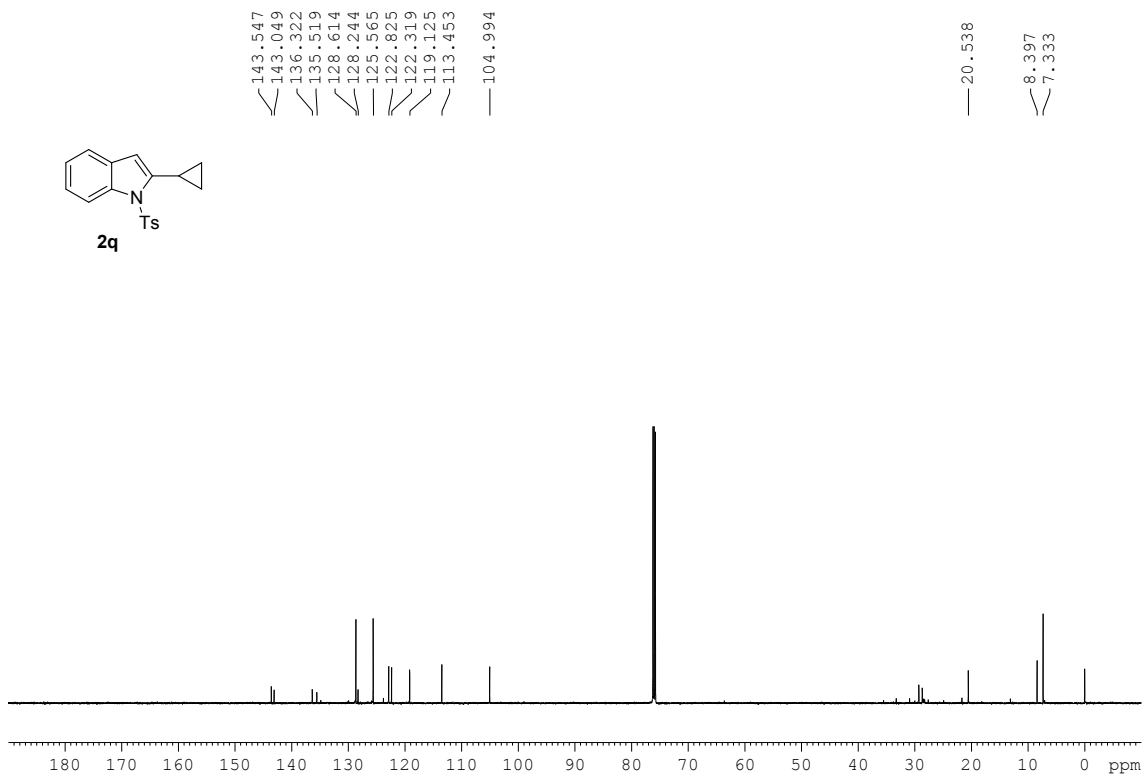

### <sup>1</sup>H NMR of compound 2r

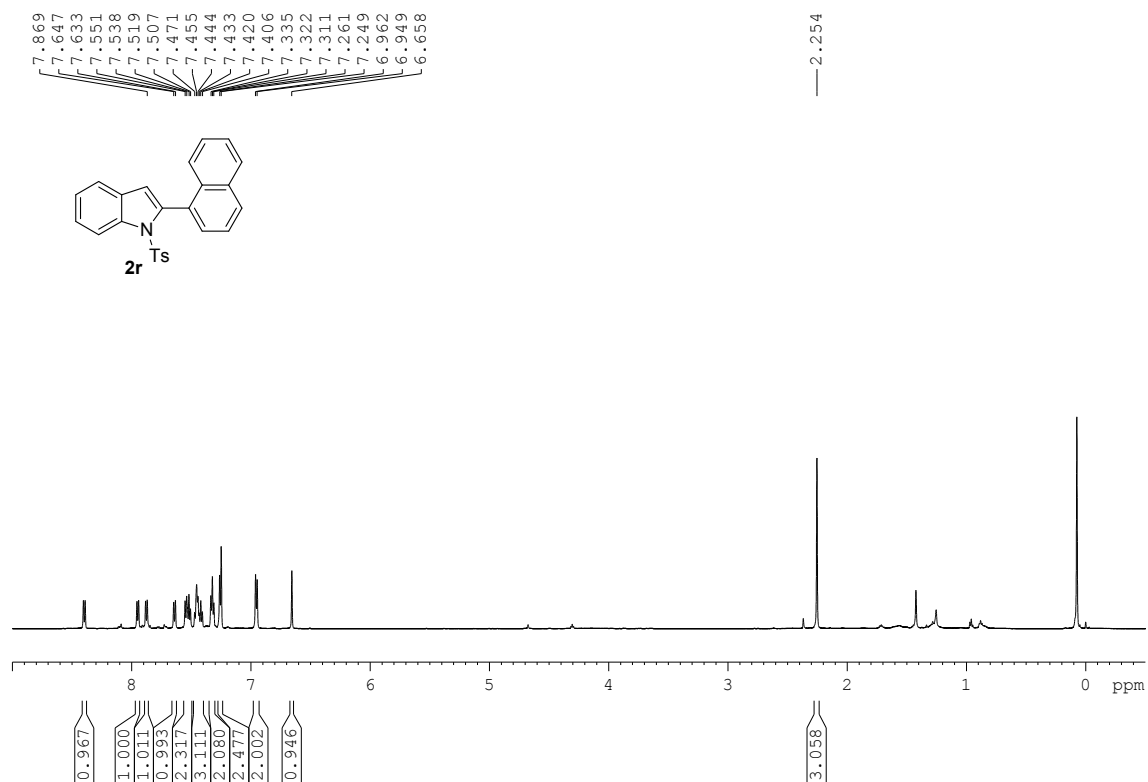

### <sup>13</sup>C NMR of compound 2r

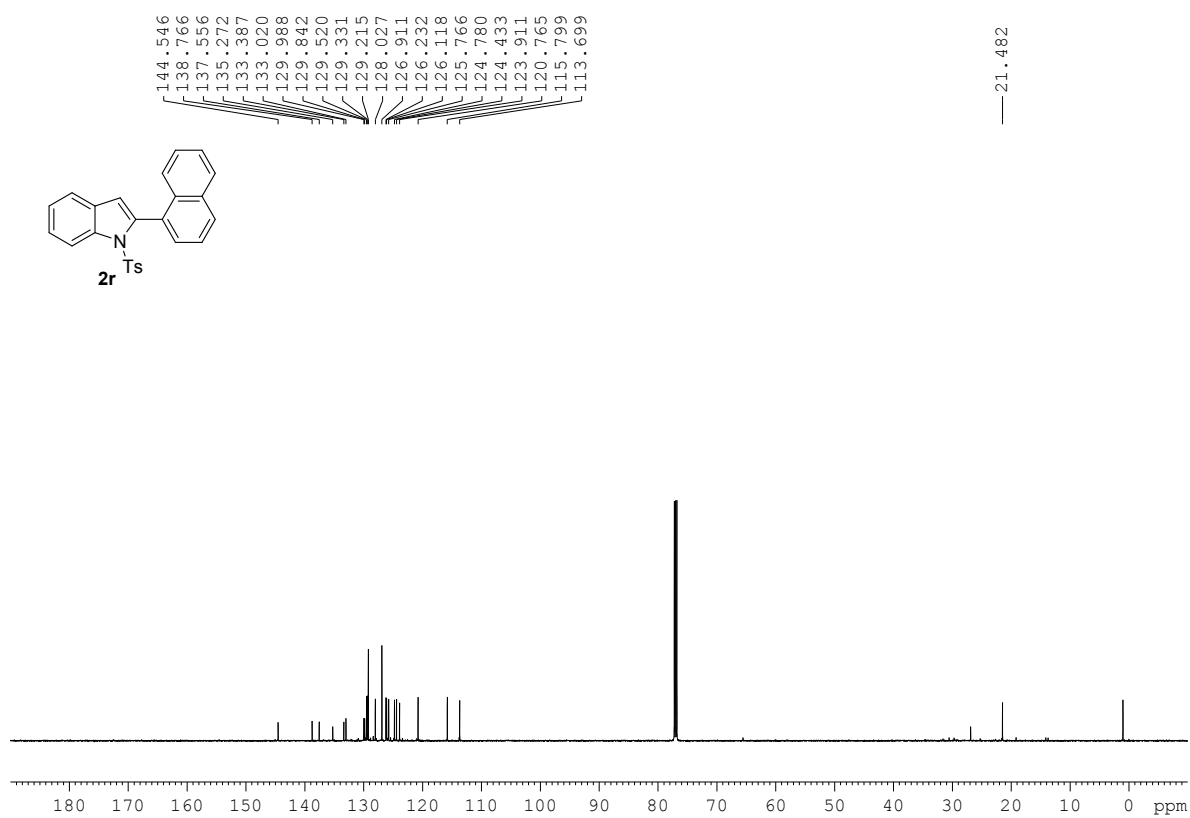

### <sup>1</sup>H NMR of compound 2s

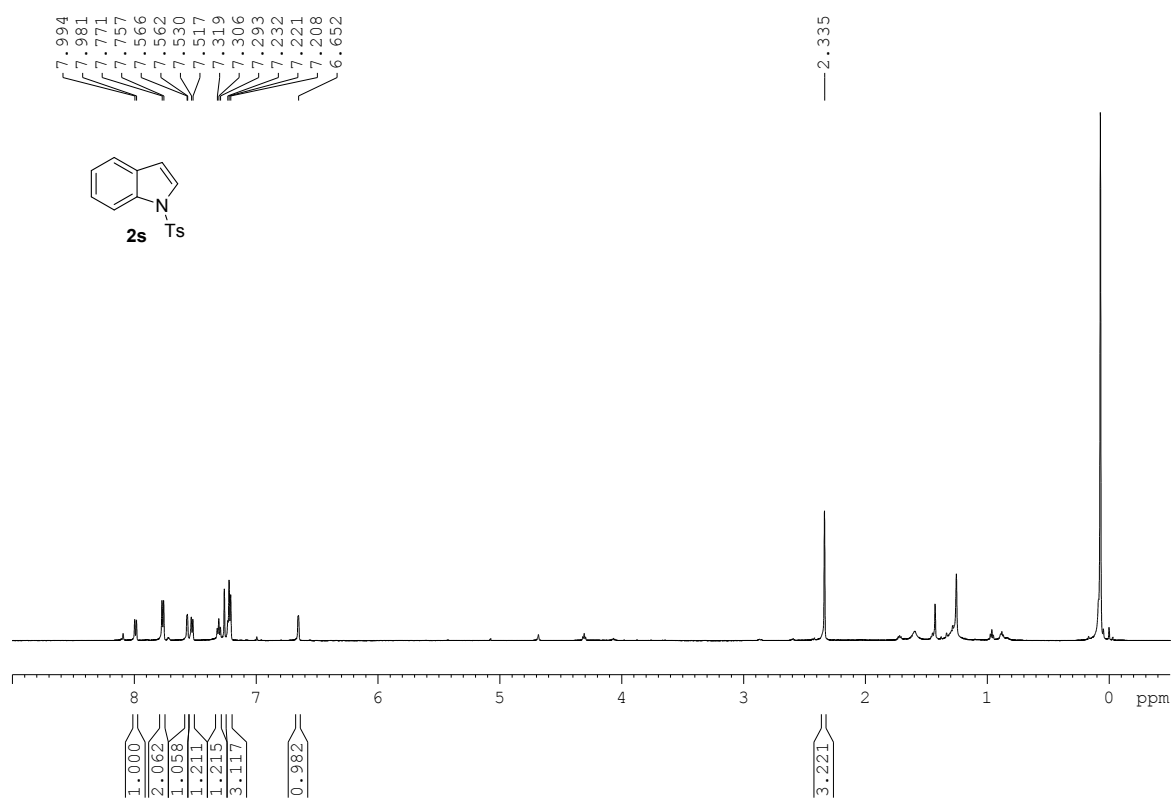

### <sup>13</sup>C NMR of compound 2s

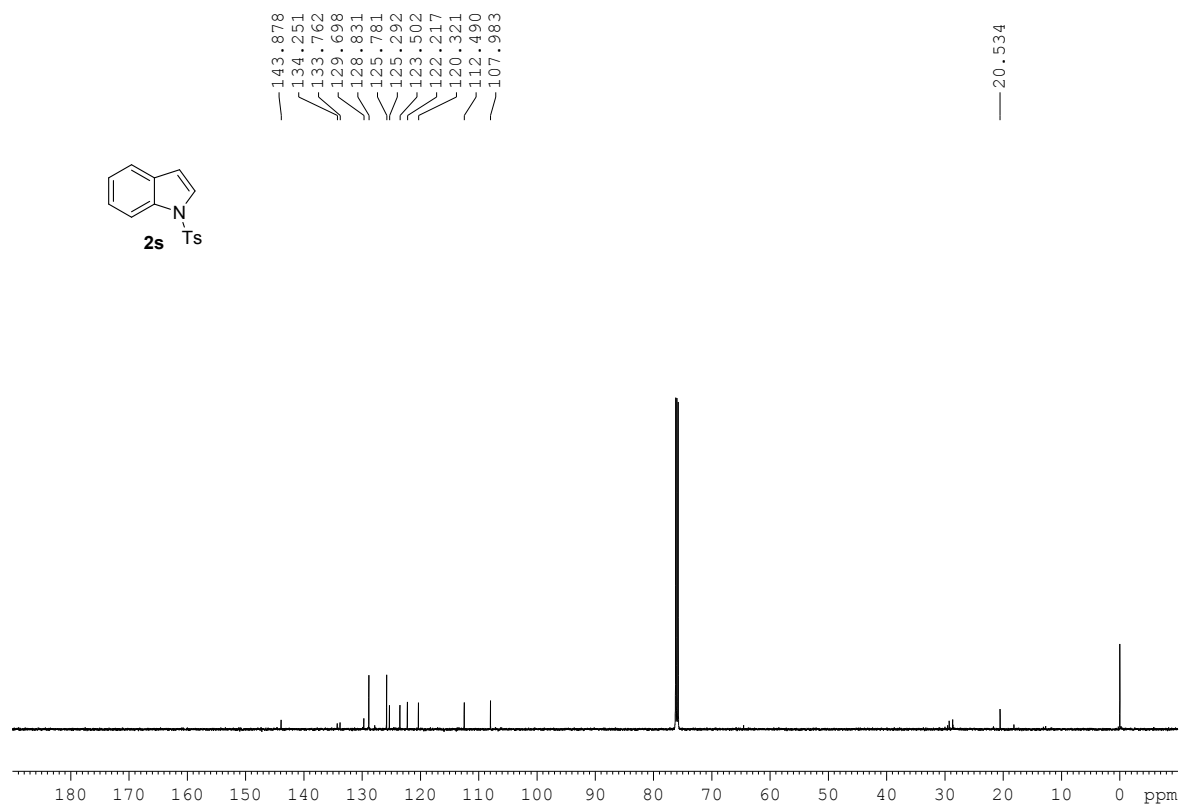



### <sup>1</sup>H NMR of compound 2t

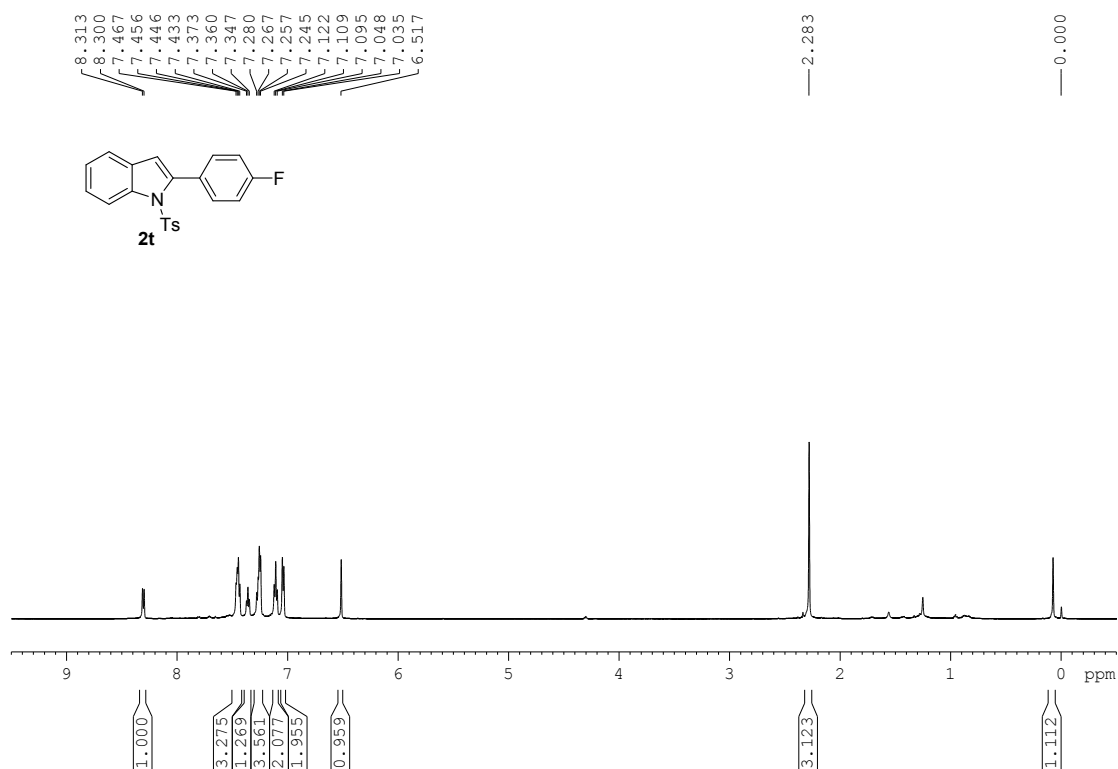

### <sup>13</sup>C NMR of compound 2t

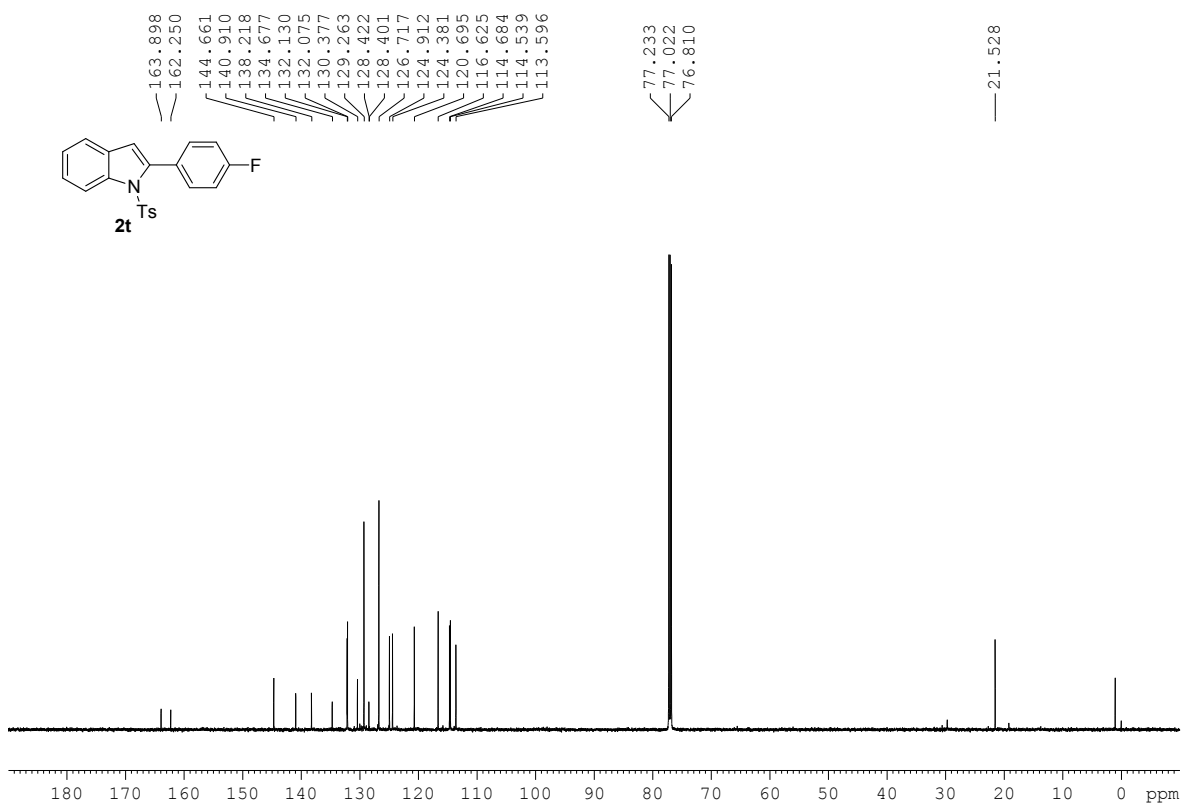

### <sup>1</sup>H NMR of compound 2u

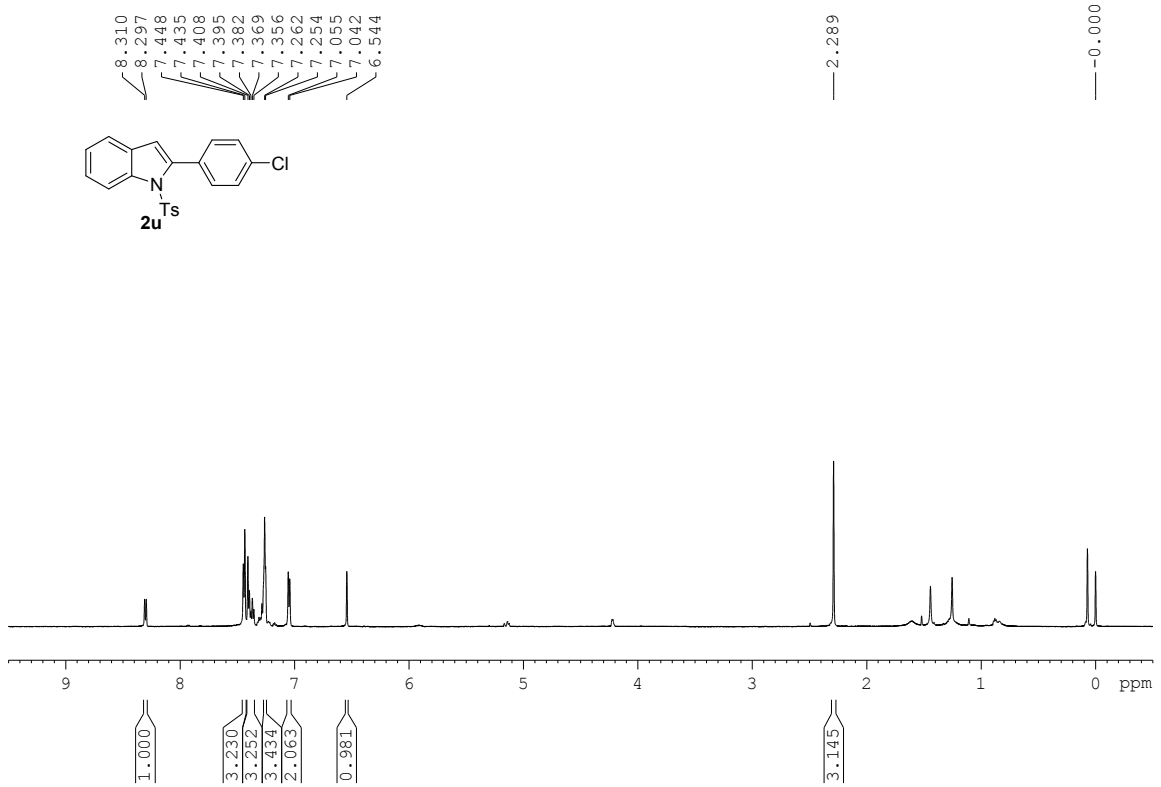

### <sup>13</sup>C NMR of compound 2u

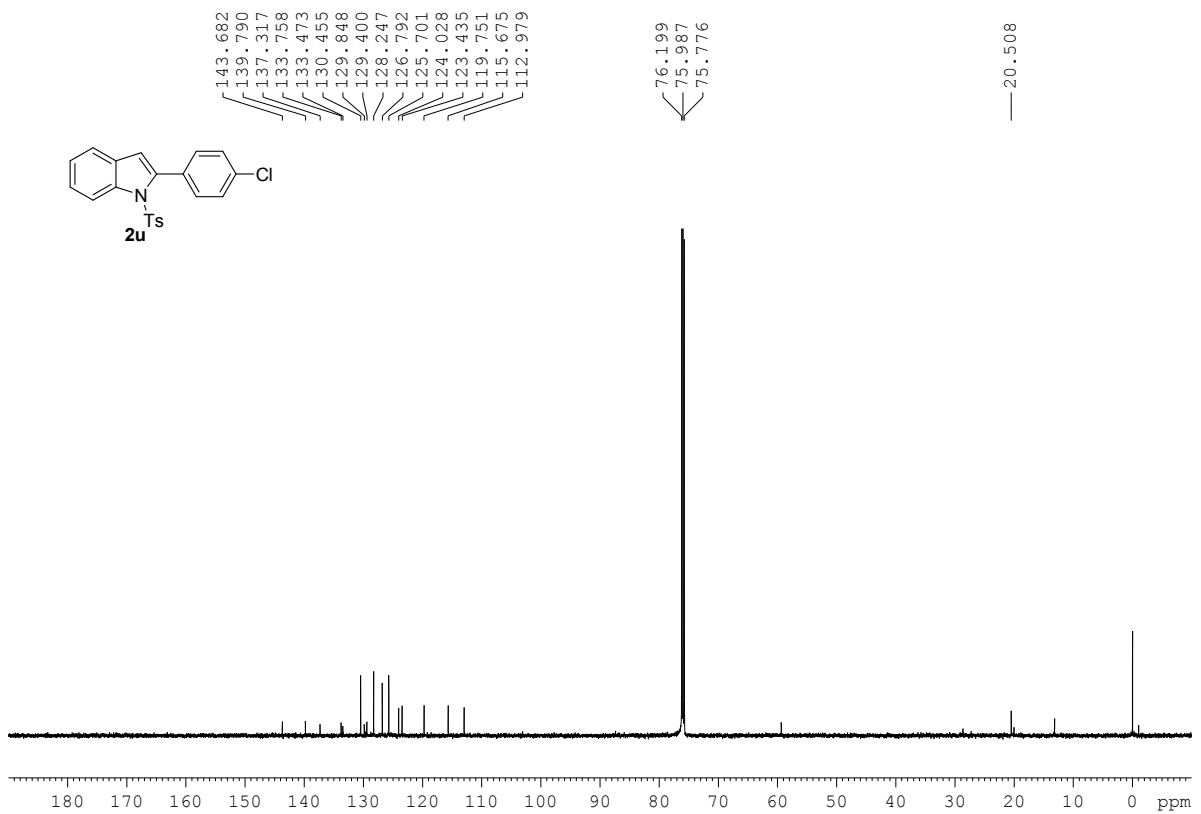

### <sup>1</sup>H NMR of compound 2w

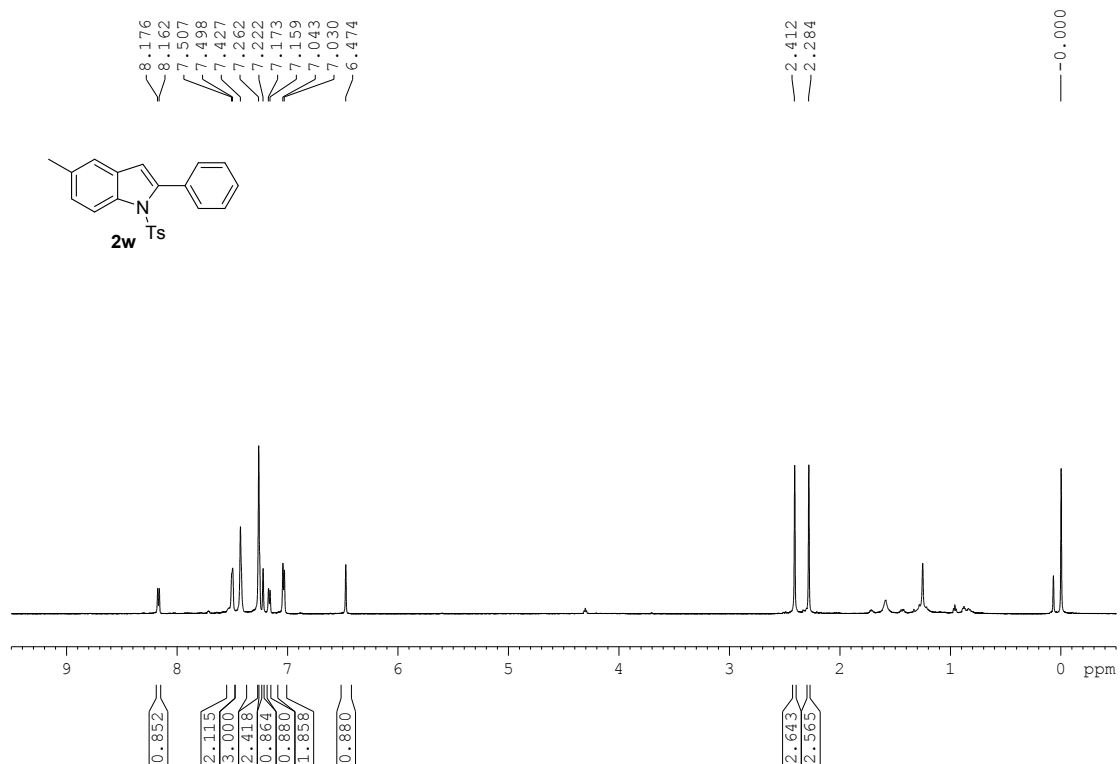

### <sup>13</sup>C NMR of compound 2w

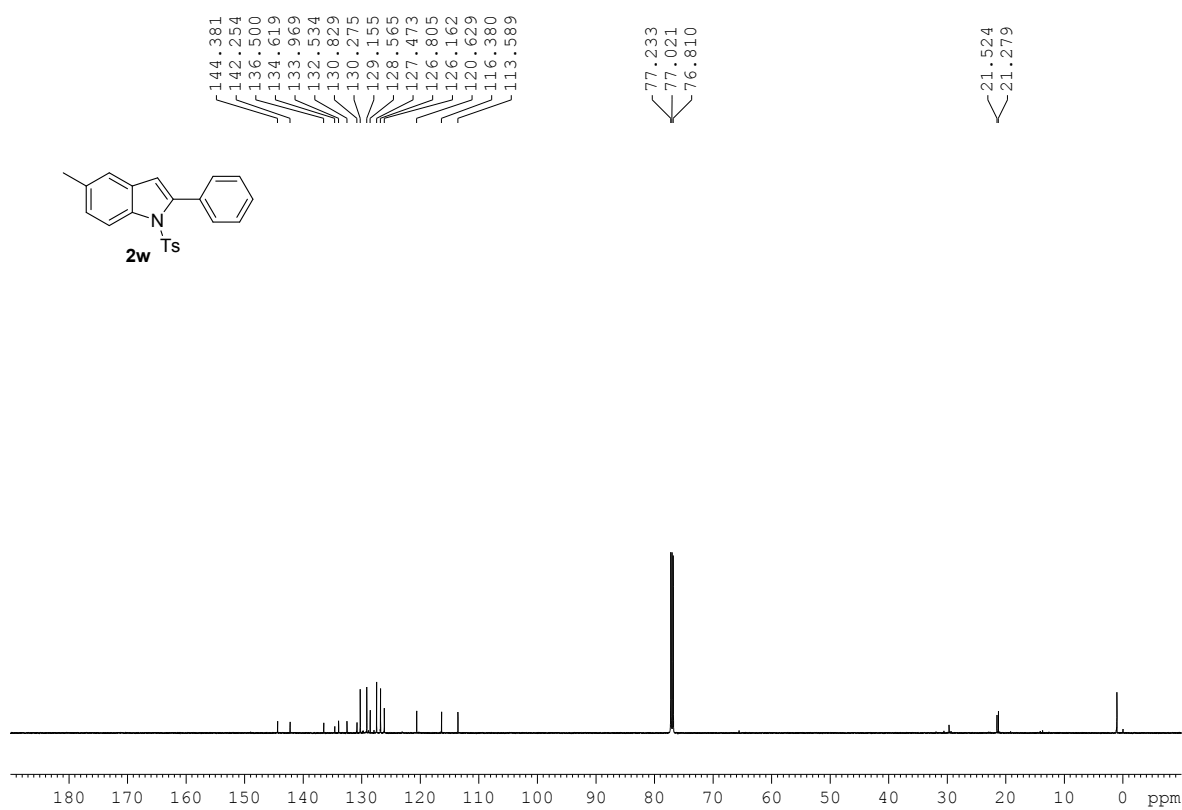

### <sup>1</sup>H NMR of compound 2x

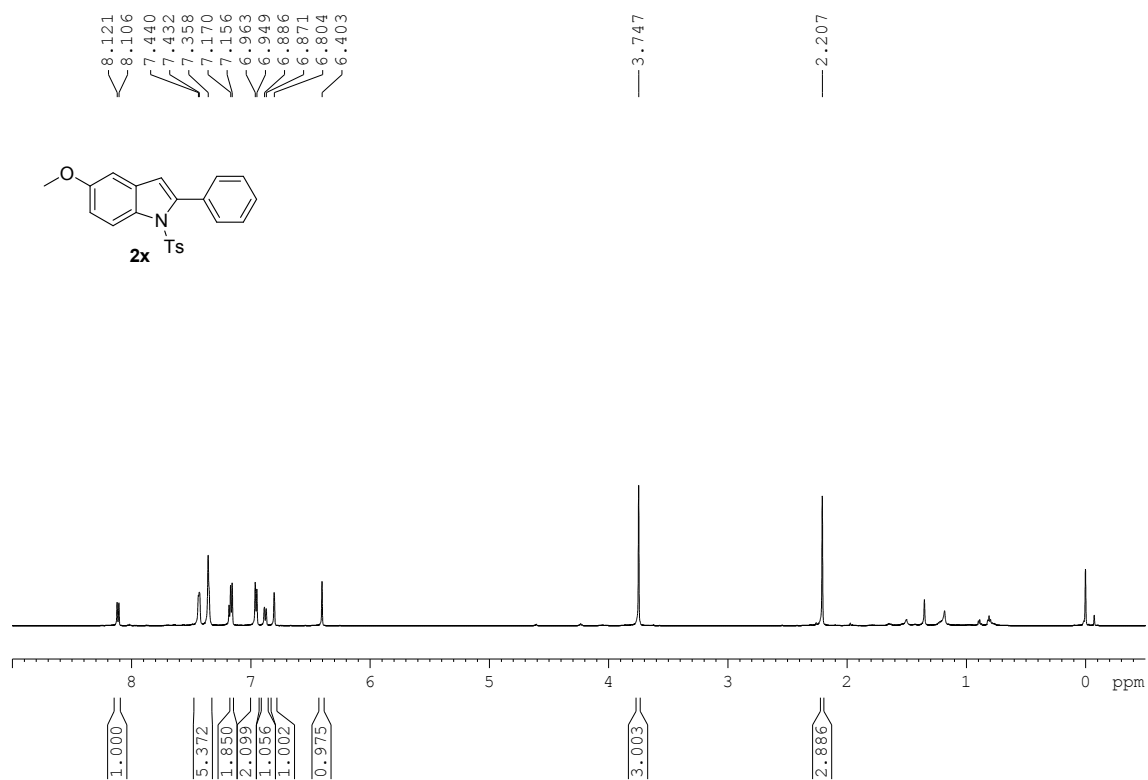

### <sup>13</sup>C NMR of compound 2x

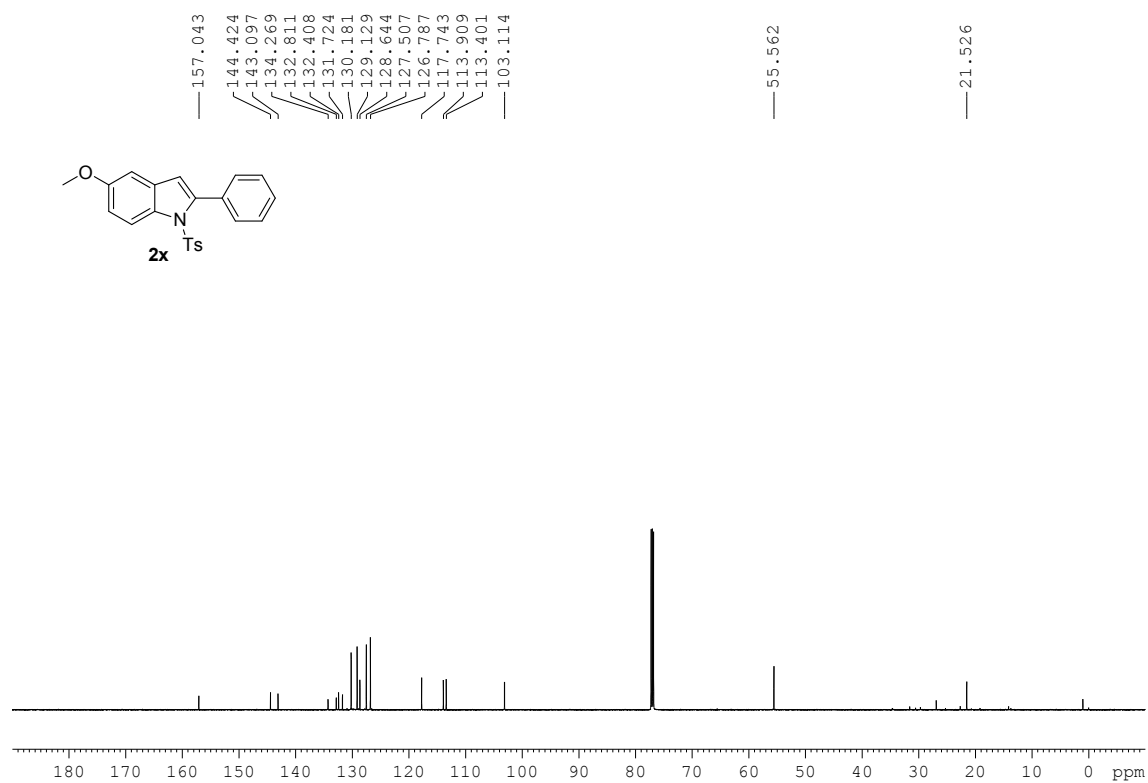

### <sup>1</sup>H NMR of compound 2y

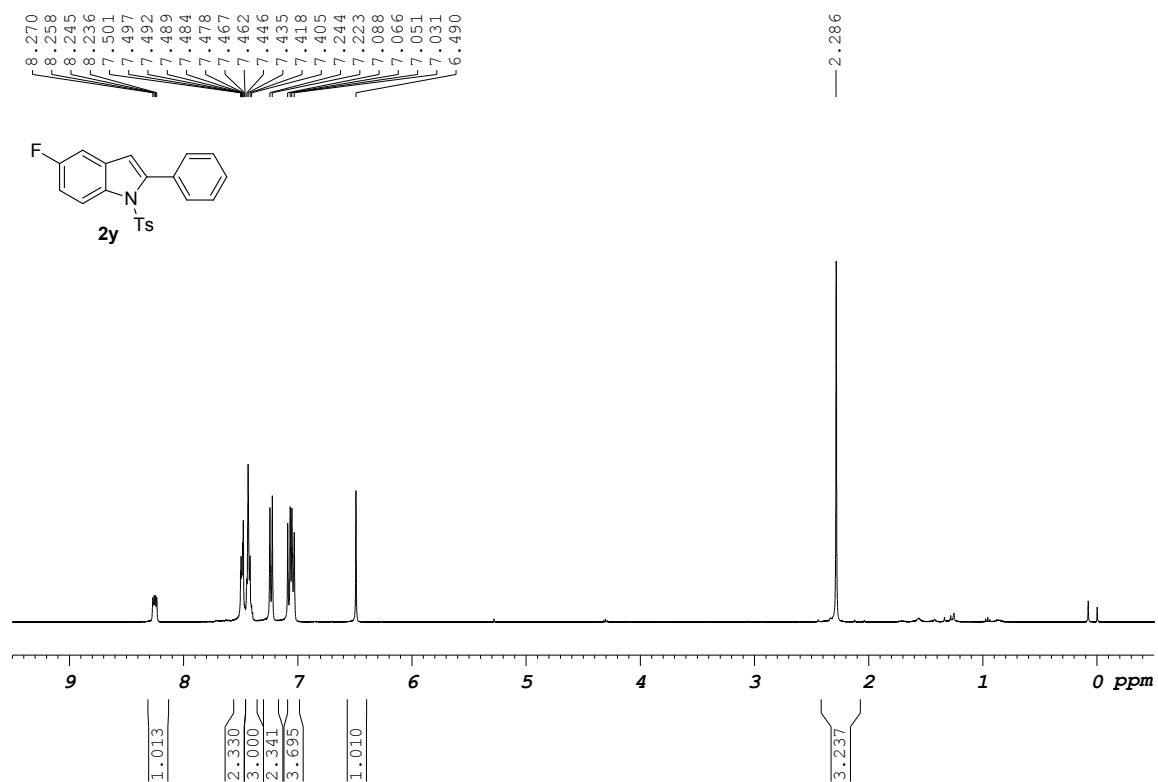

### <sup>13</sup>C NMR of compound 2y

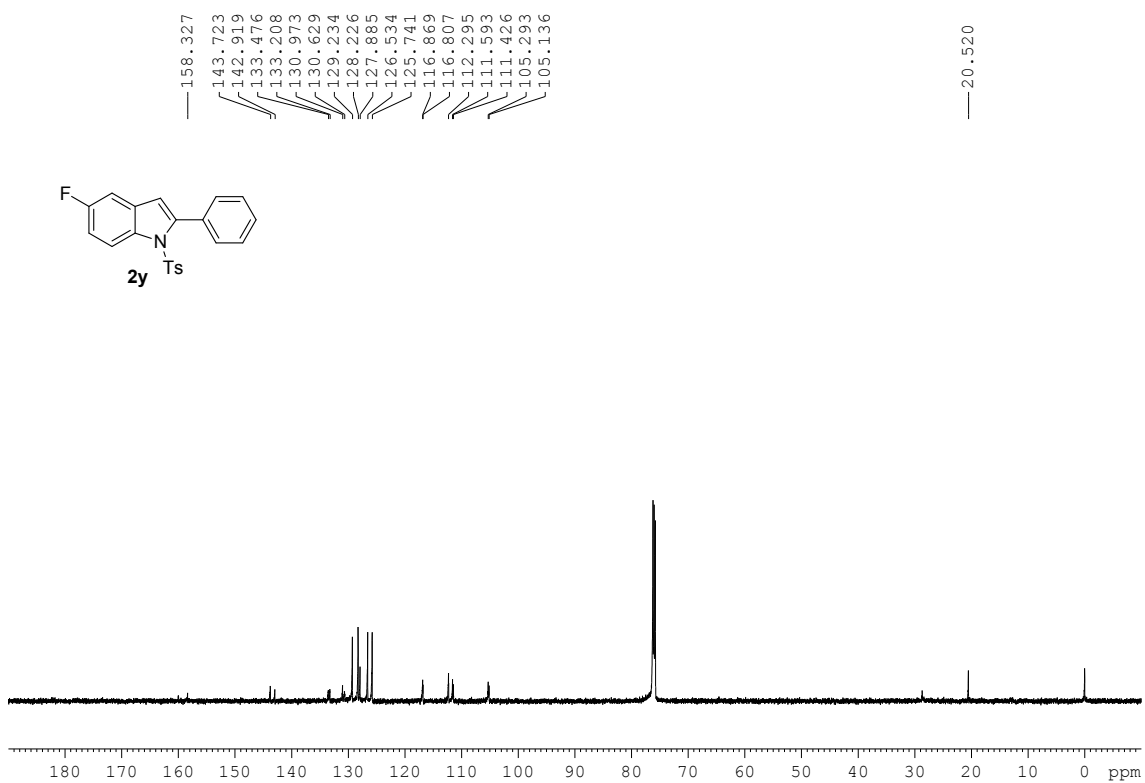

### <sup>1</sup>H NMR of compound 2z

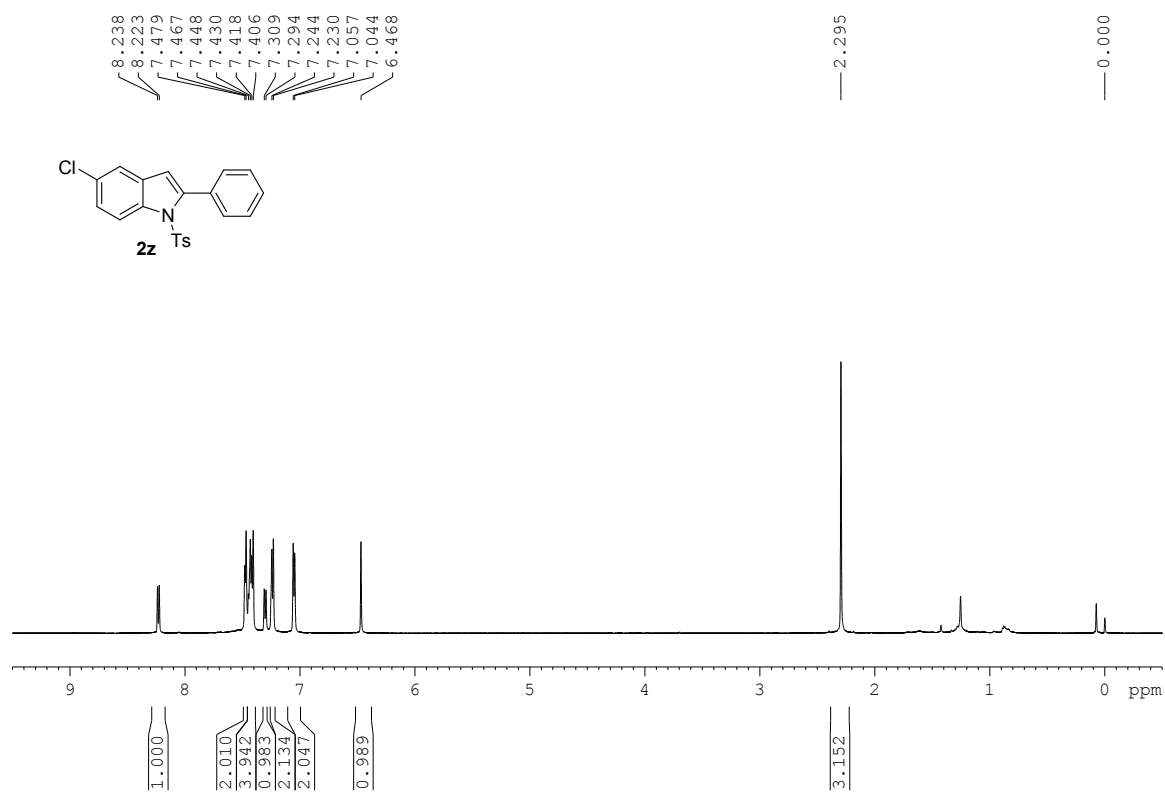

### <sup>13</sup>C NMR of compound 2z

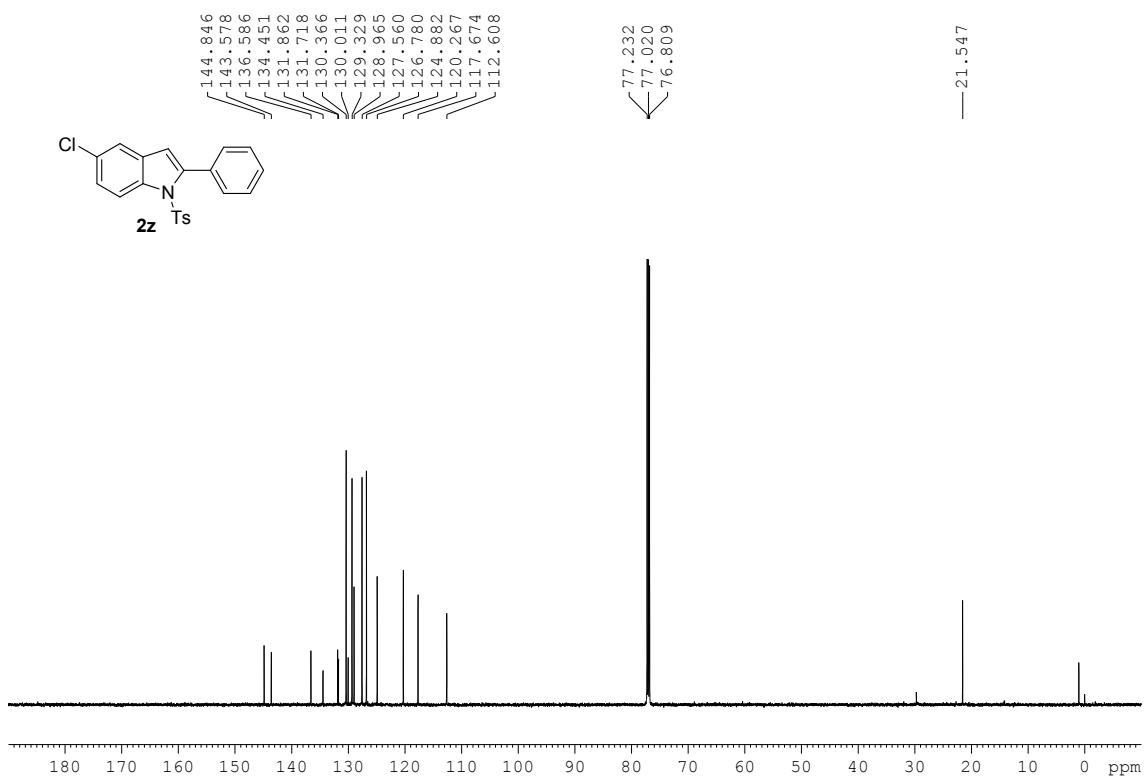

### <sup>1</sup>H NMR of compound 2aa

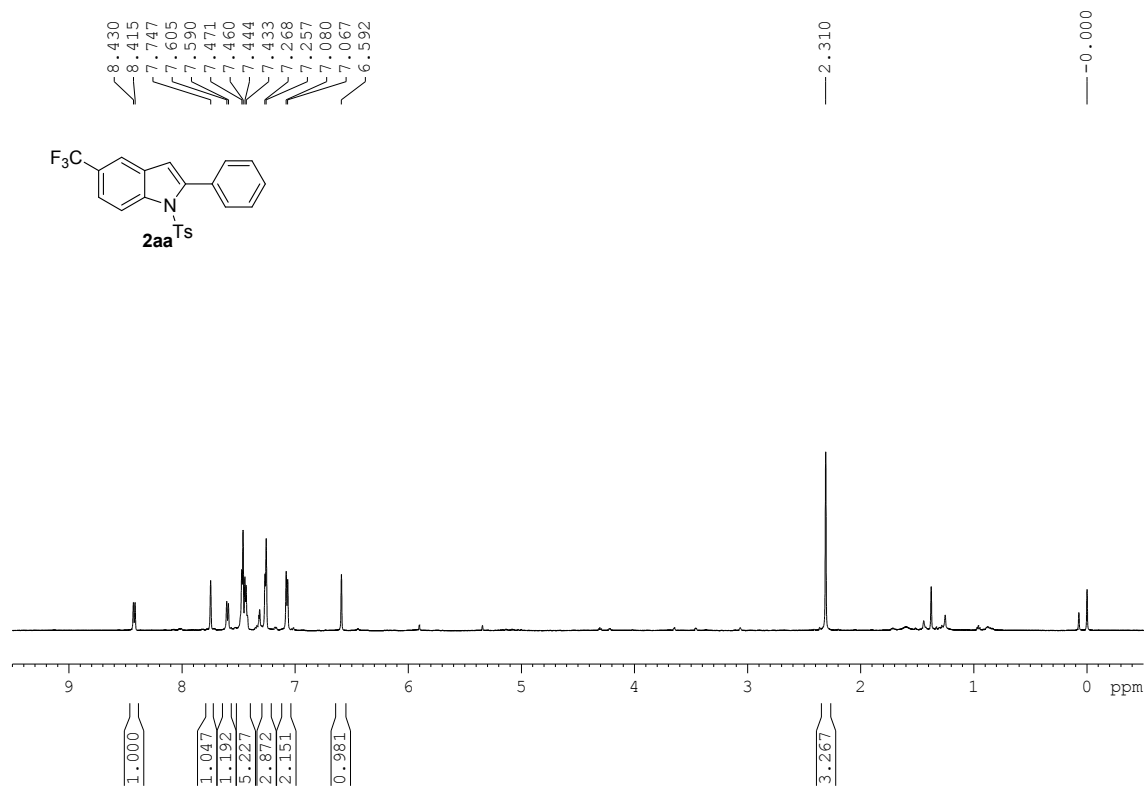

### <sup>13</sup>C NMR of compound 2aa

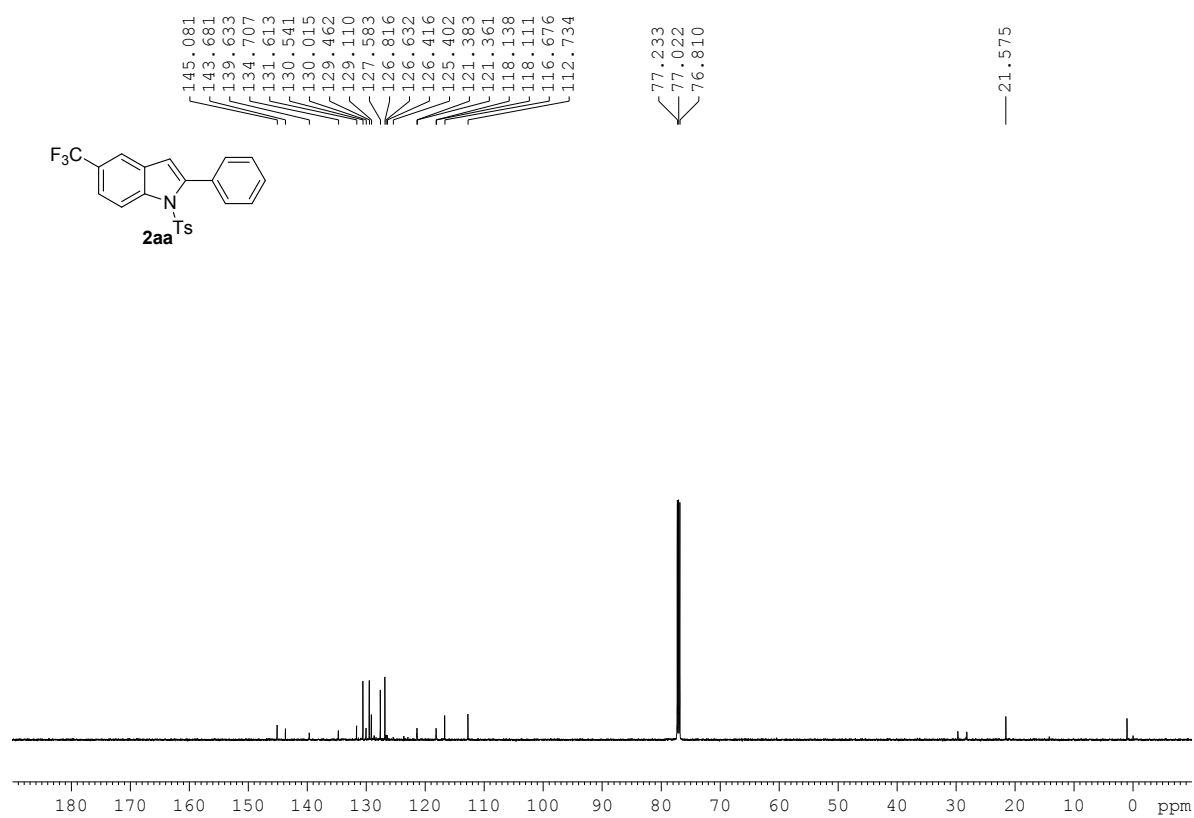

### <sup>1</sup>H NMR of compound 2ab

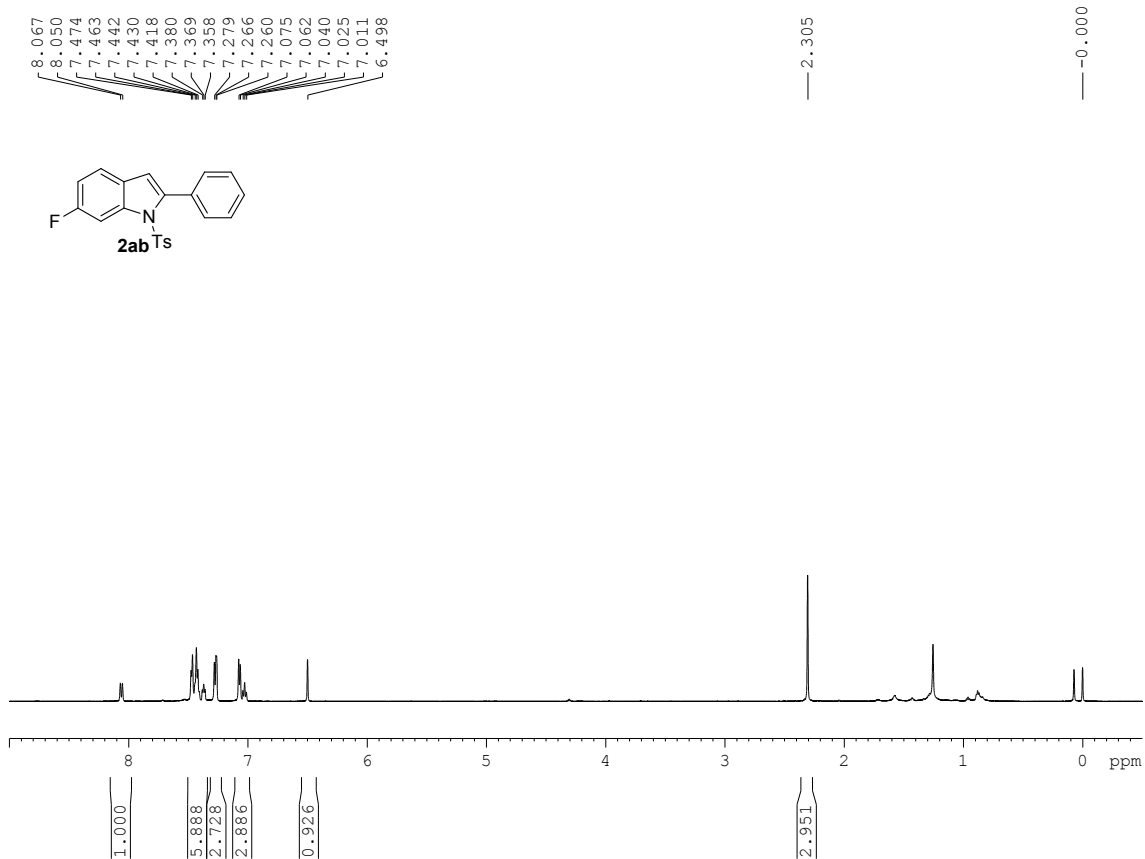

### <sup>13</sup>C NMR of compound 2ab

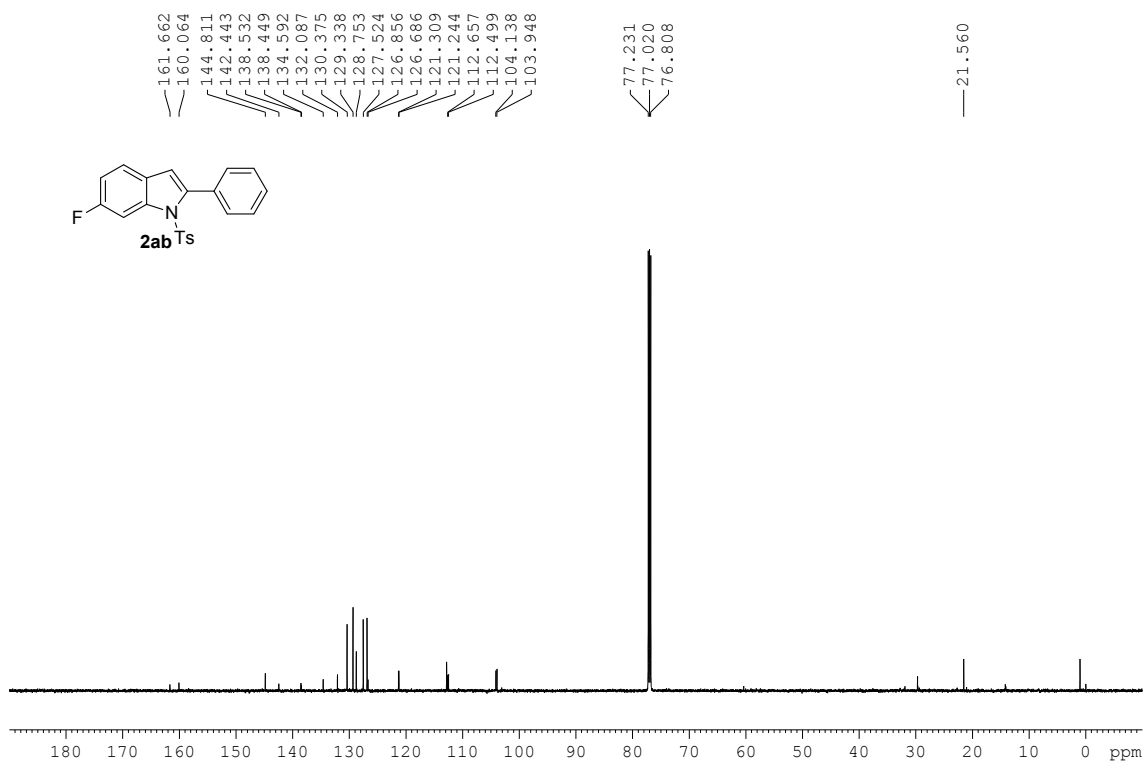



### <sup>1</sup>H NMR of compound 2ac

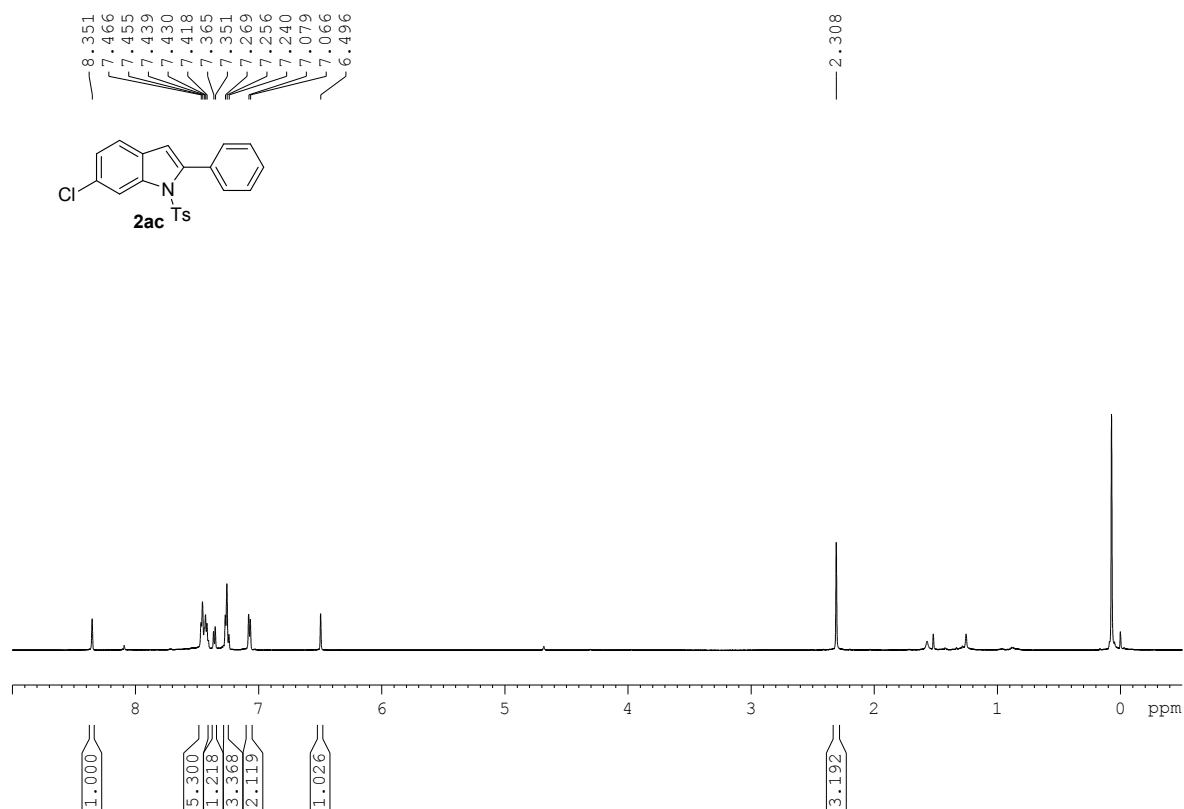

### <sup>13</sup>C NMR of compound 2ac

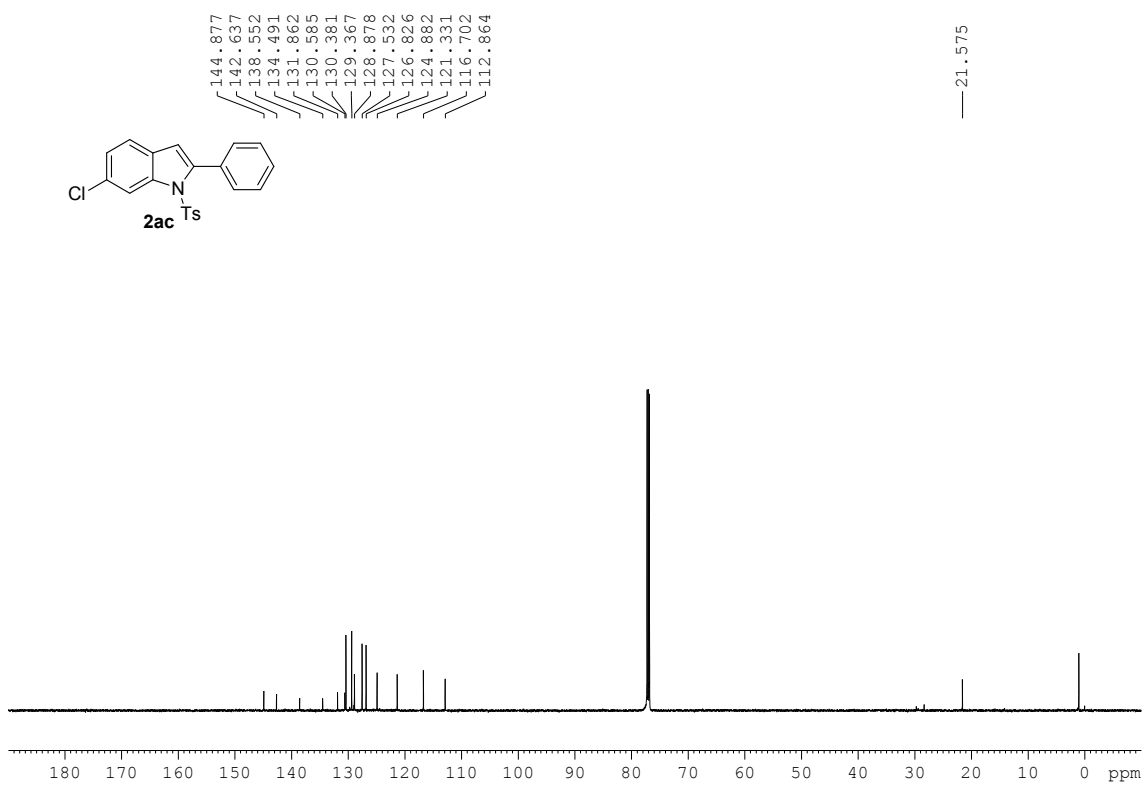

### <sup>1</sup>H NMR of compound 2ad

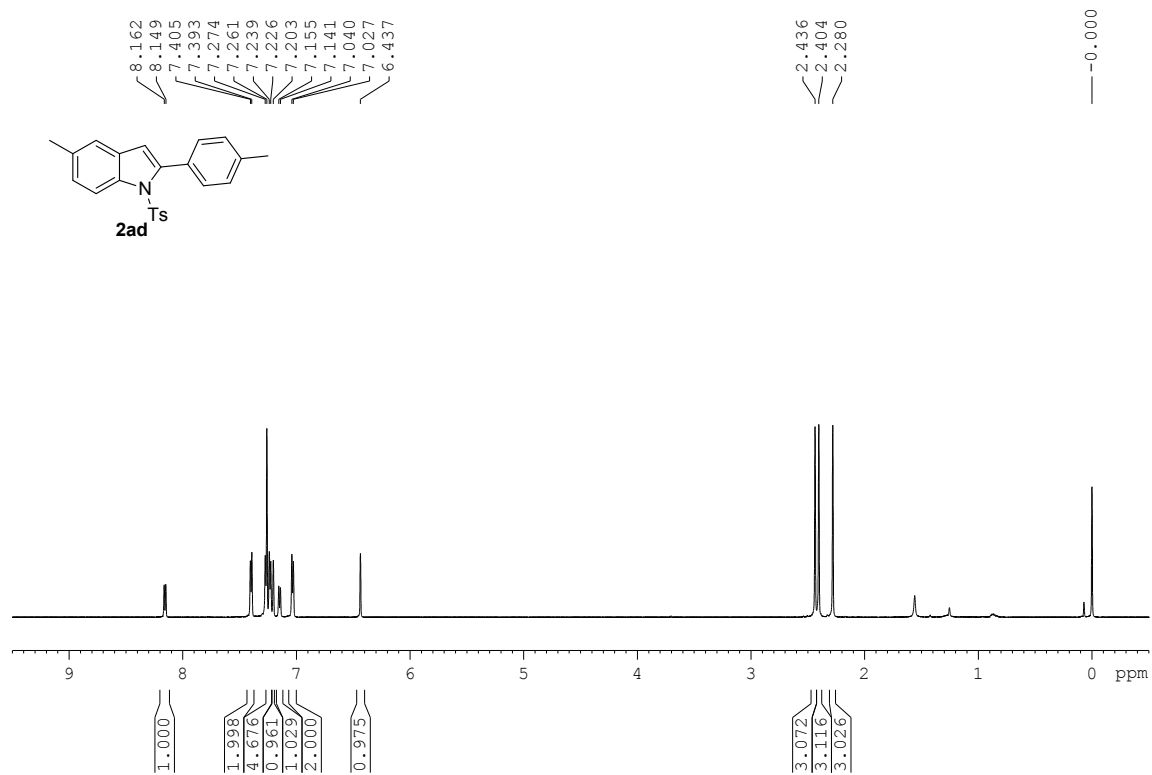

### <sup>13</sup>C NMR of compound 2ad

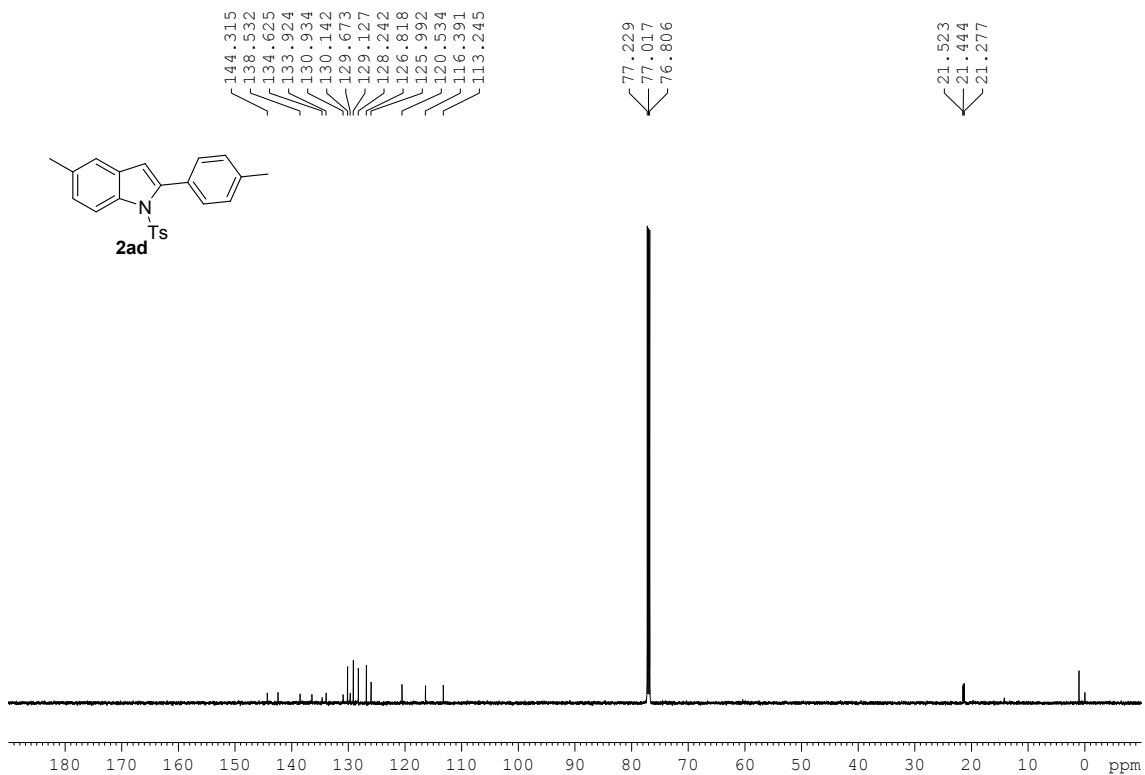

### <sup>1</sup>H NMR of compounds 2ae

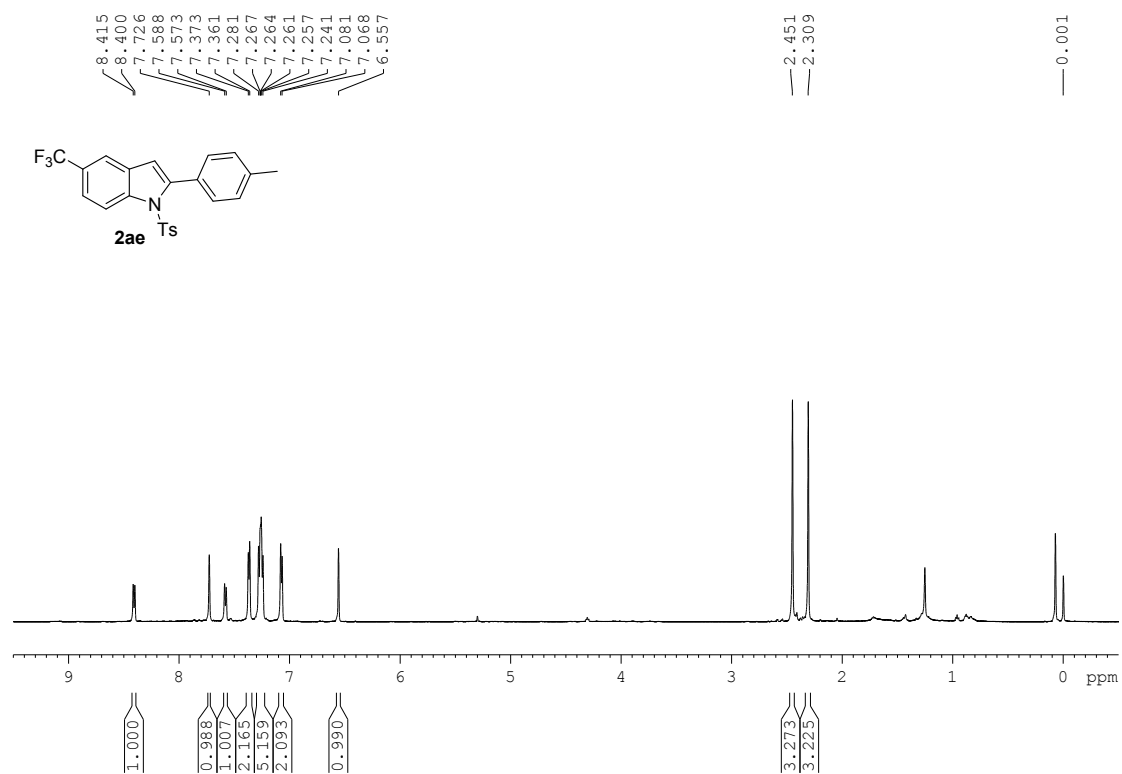

### <sup>13</sup>C NMR of compounds 2ae

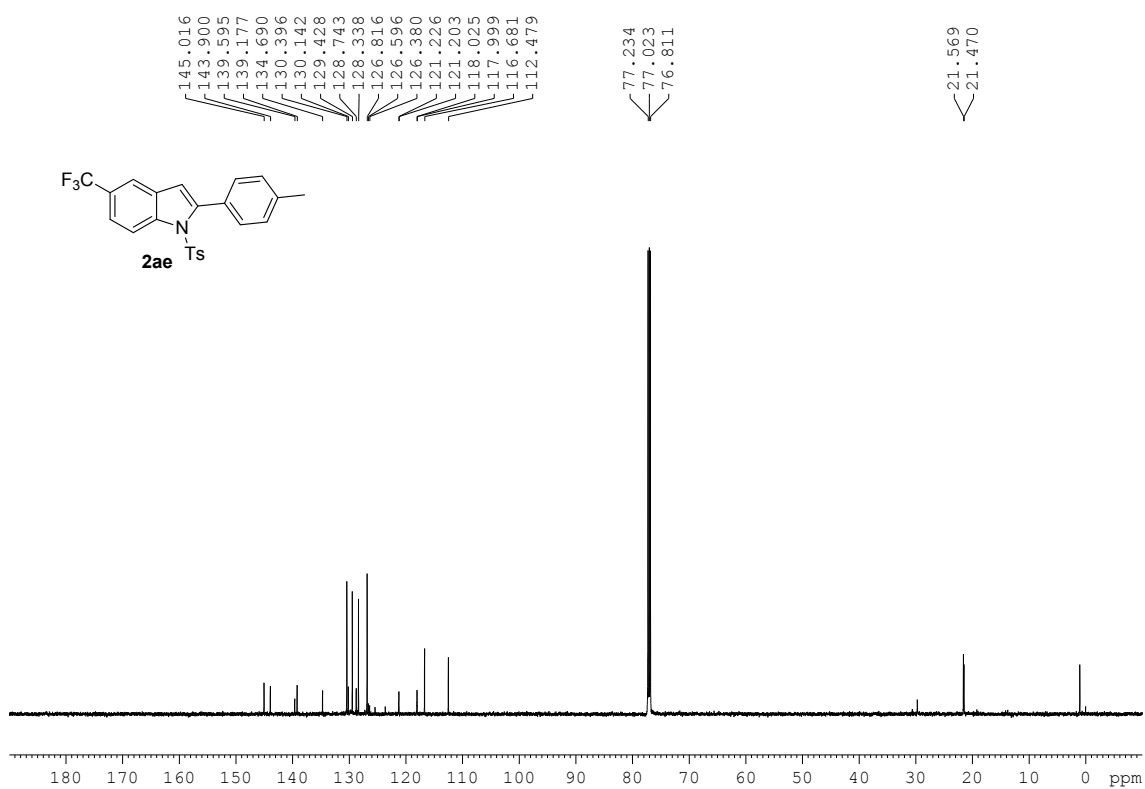

Supplement: c6ra03378d1.pdf [file c6ra03378d1.pdf]
